# Supplementary material for: Palladium-catalyzed cross-coupling of various phosphorus pronucleophiles with chloropyrazines: synthesis of novel Am(iii)-selective extractants
Source: Royal Society of Chemistry journal article supplement (doi:10.1039/c2ob25787d), 2012-01-01

## Electronic Supplementary Information

# Palladium–Catalyzed Cross-Coupling of Various Phosphorus Pronucleophiles with Chloropyrazines: Synthesis of Novel Am(III)-selective Extractants

Nicolai I. Nikishkin,<sup>[a]</sup> Jurriaan Huskens,<sup>[a]</sup> Jana Assenmacher,<sup>[b]</sup> Andreas  
Wilden,<sup>[b]</sup> Giuseppe Modolo<sup>[b]</sup> and Willem Verboom\*<sup>[a]</sup>

<sup>[a]</sup> *Laboratory of Molecular Nanofabrication, MESA+ Institute for Nanotechnology,  
University of Twente, P.O. Box 217, 7500 AE Enschede, The Netherlands*

<sup>[b]</sup> *Forschungszentrum Jülich GmbH, Institut für Energie- und Klimaforschung – Nukleare  
Entsorgung und Reaktorsicherheit (IEK-6), 52425 Jülich, Germany*

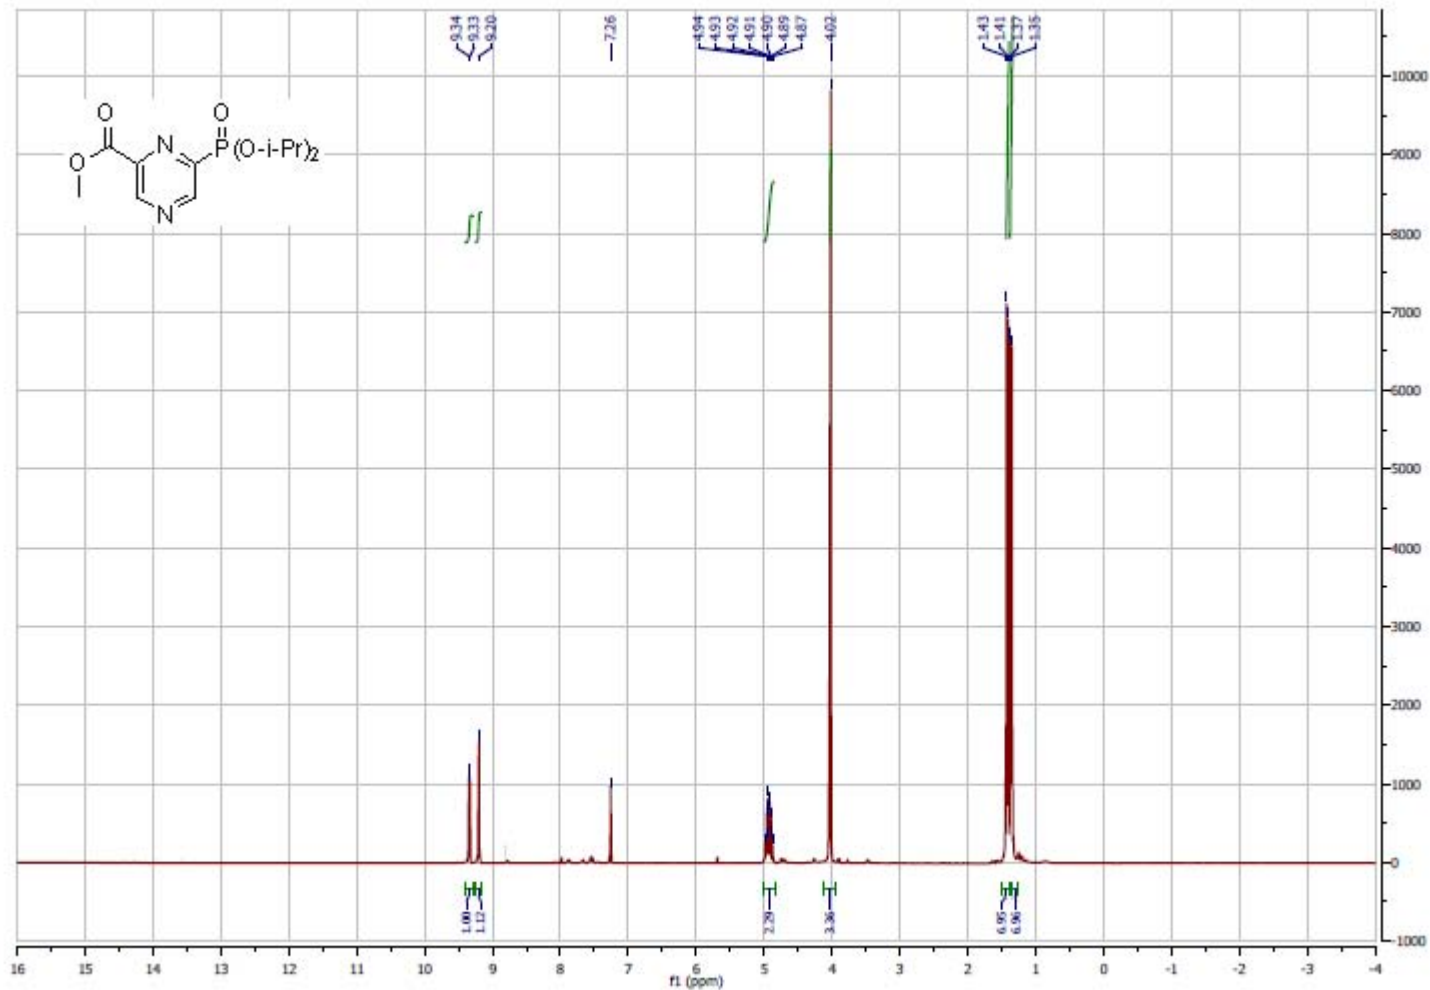

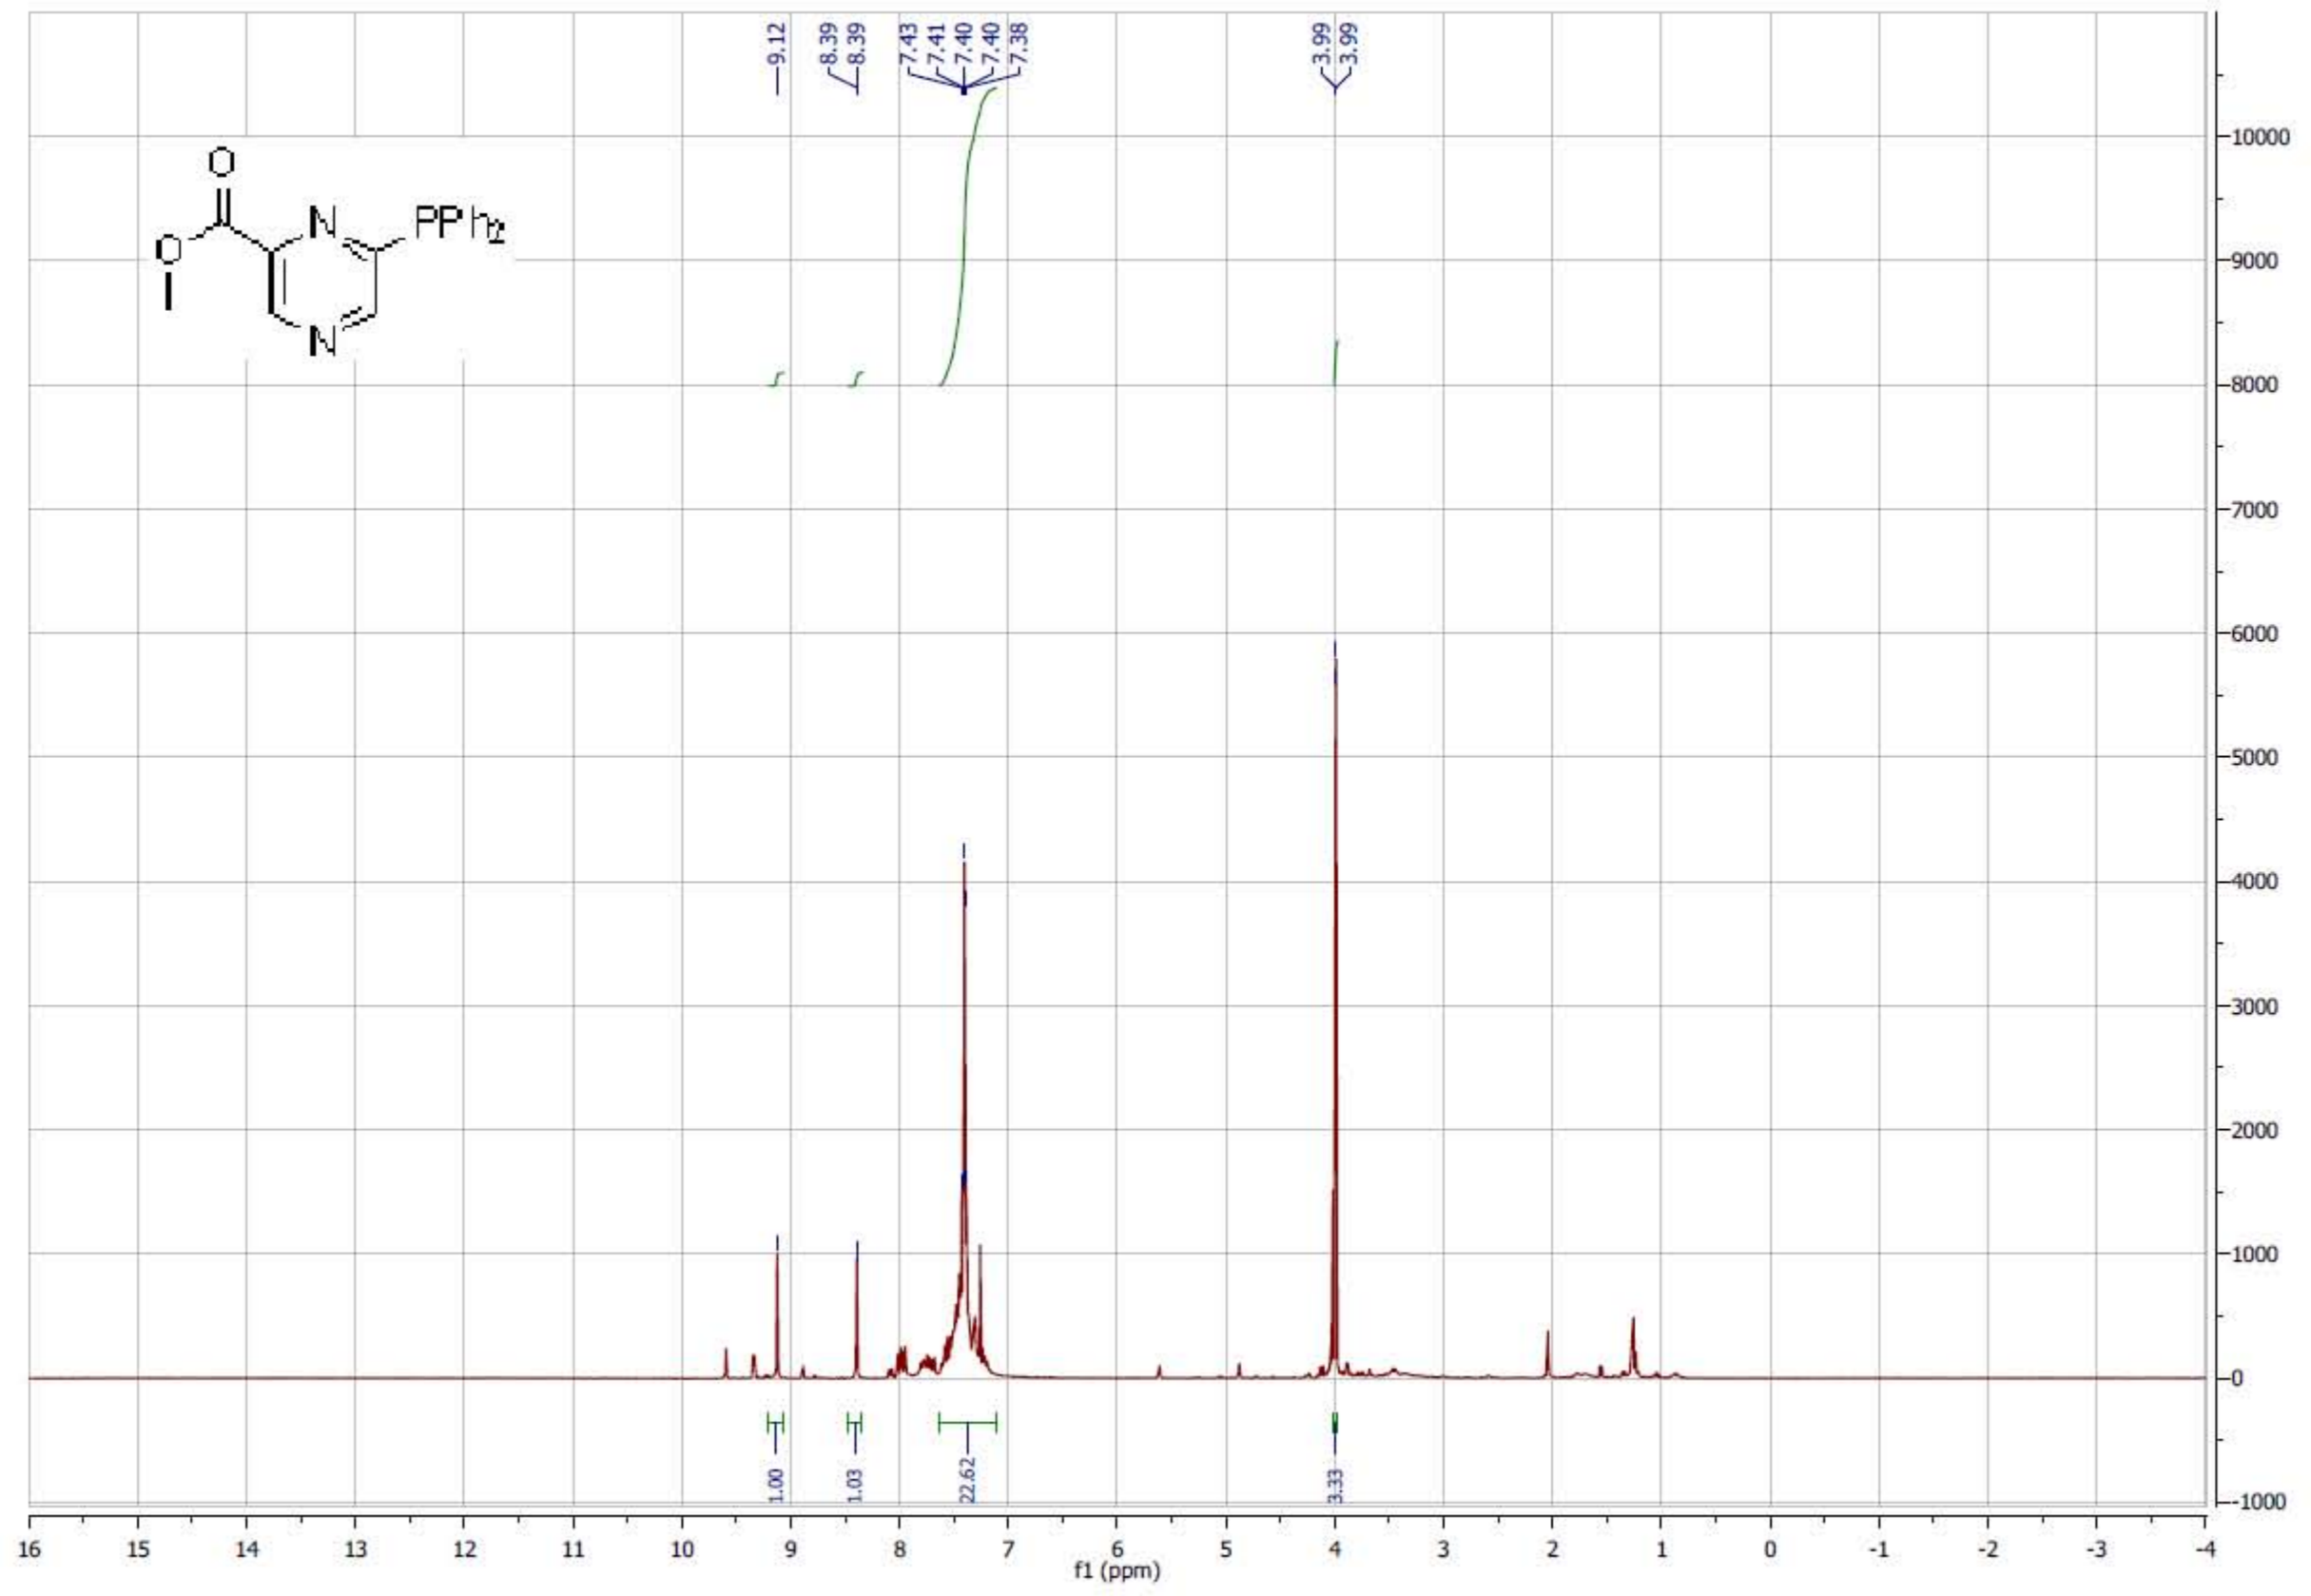

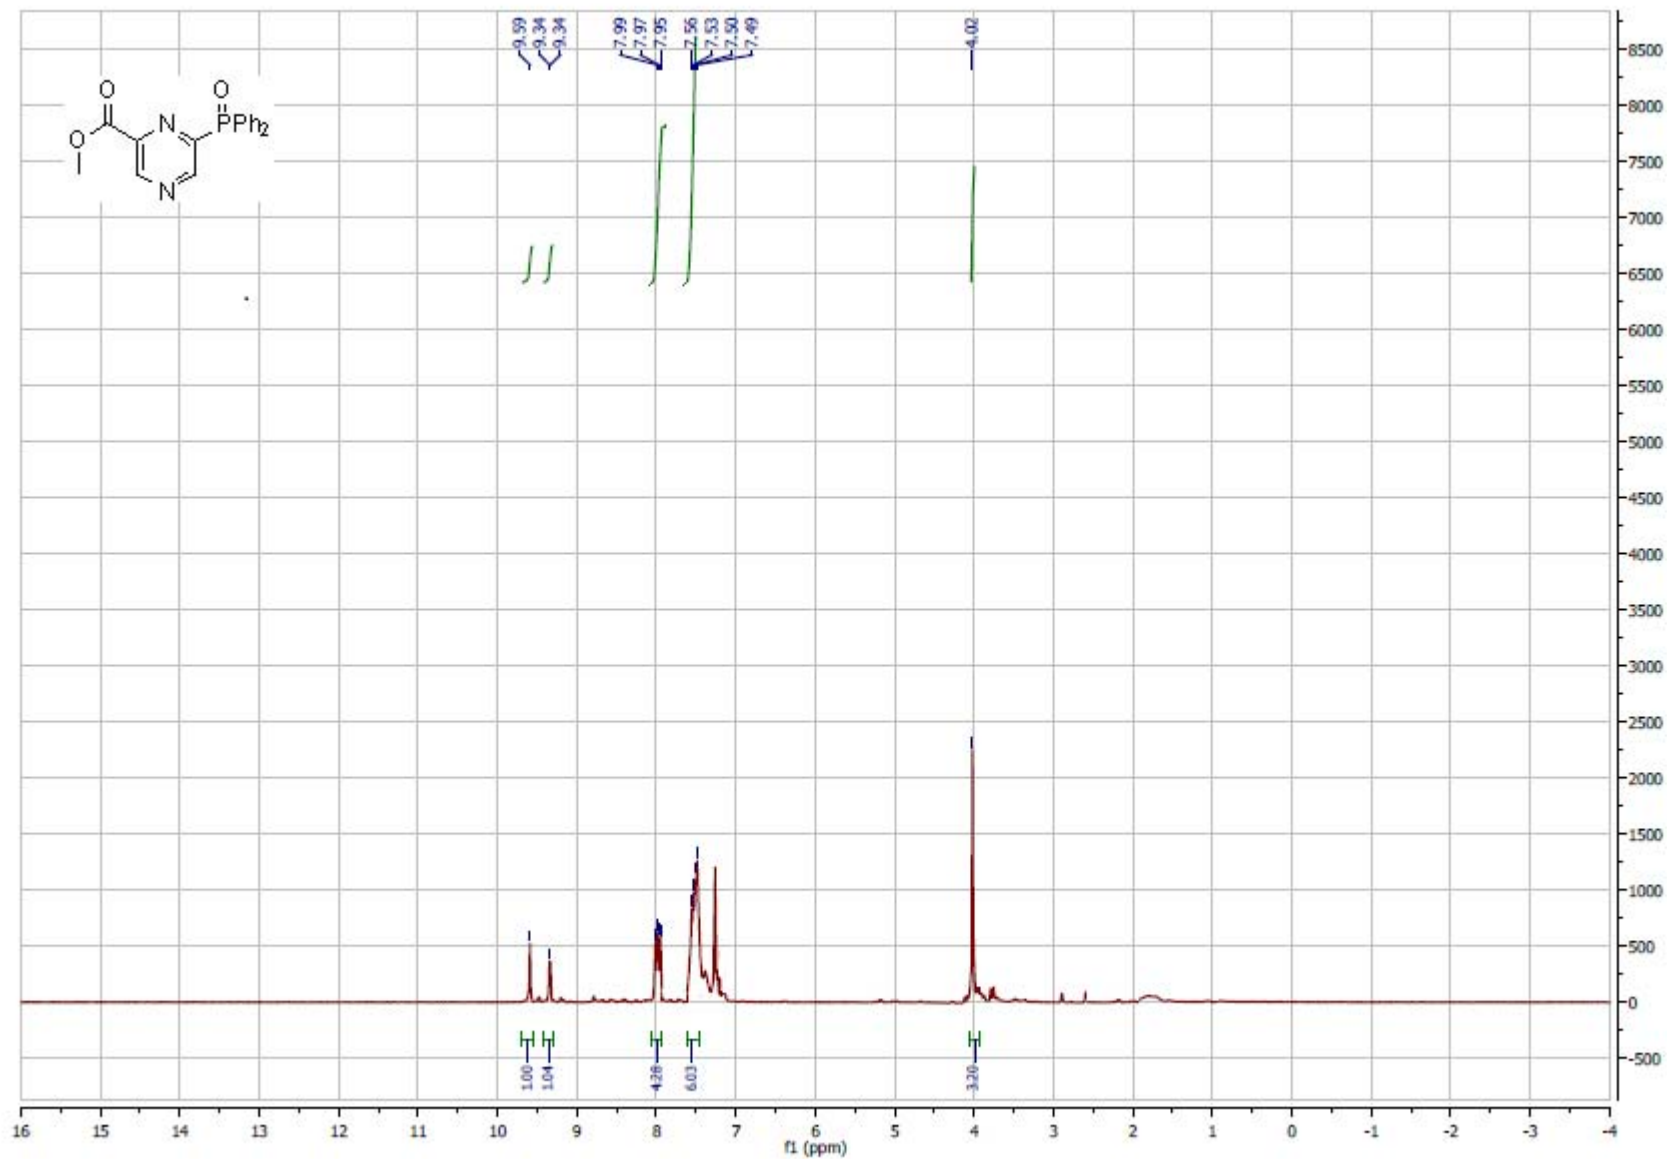

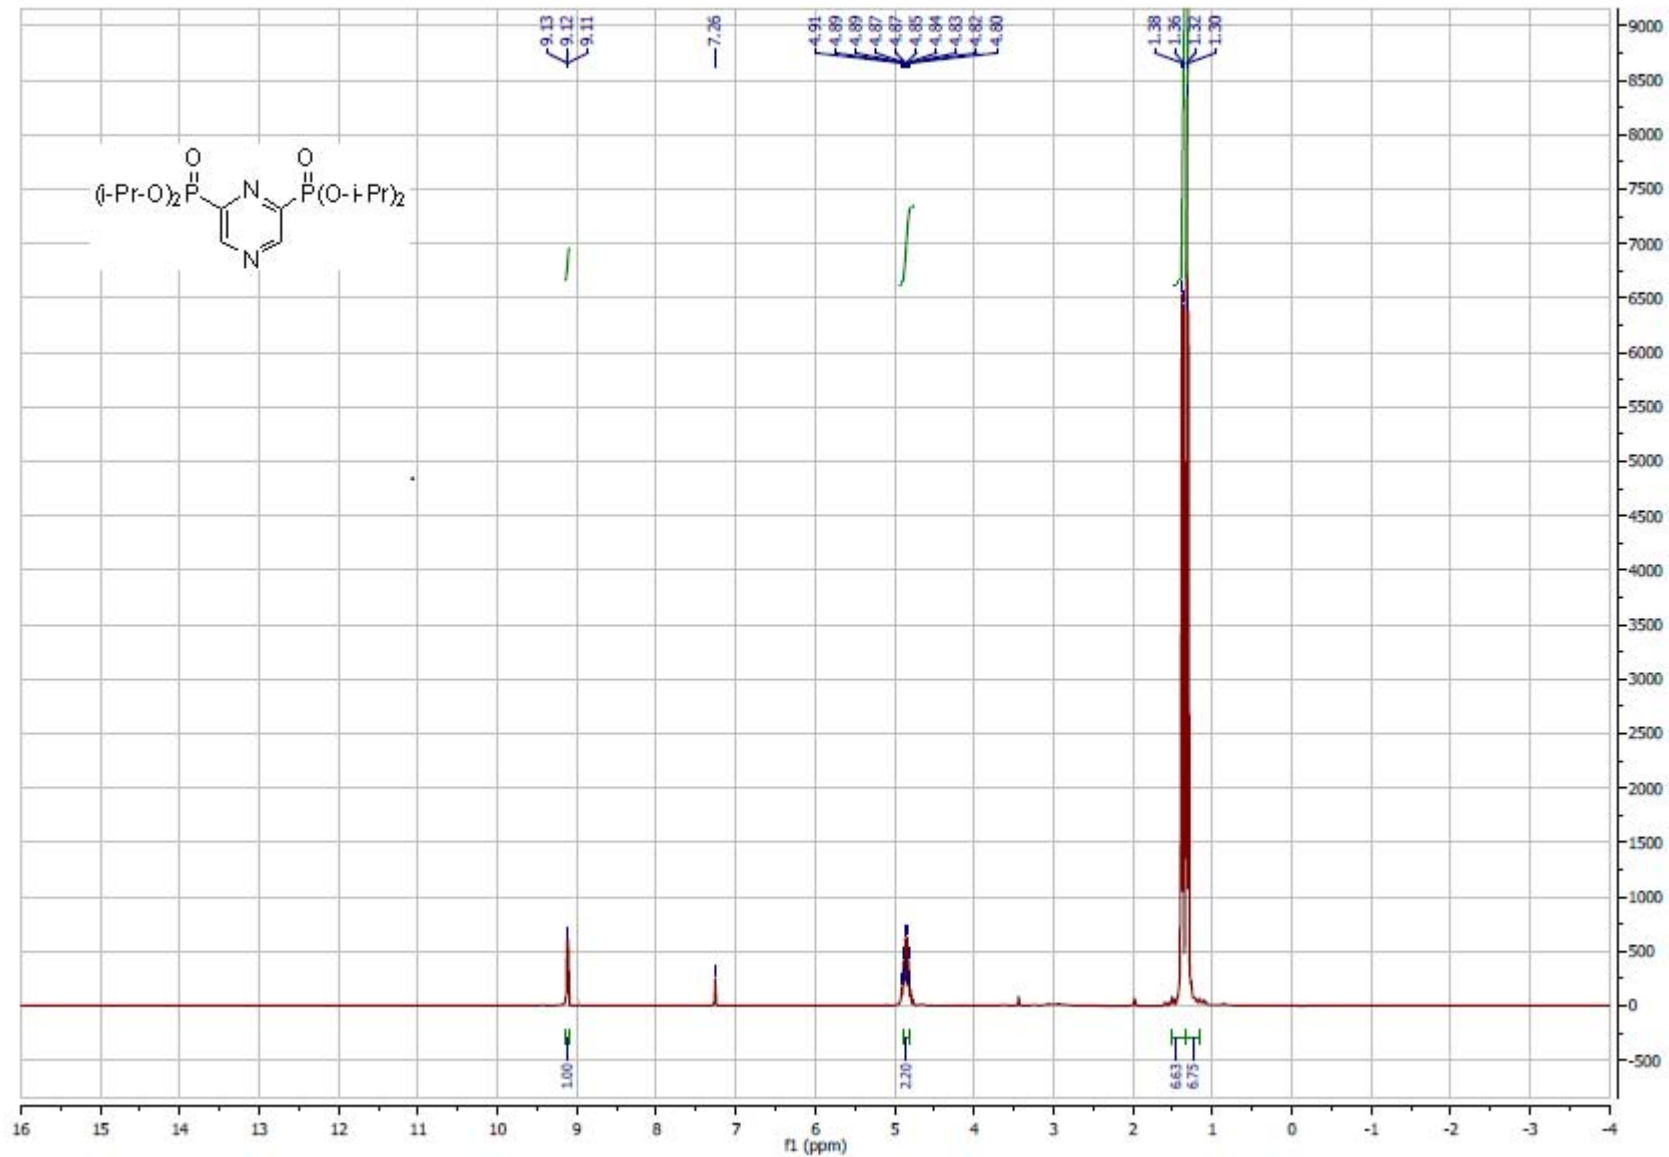

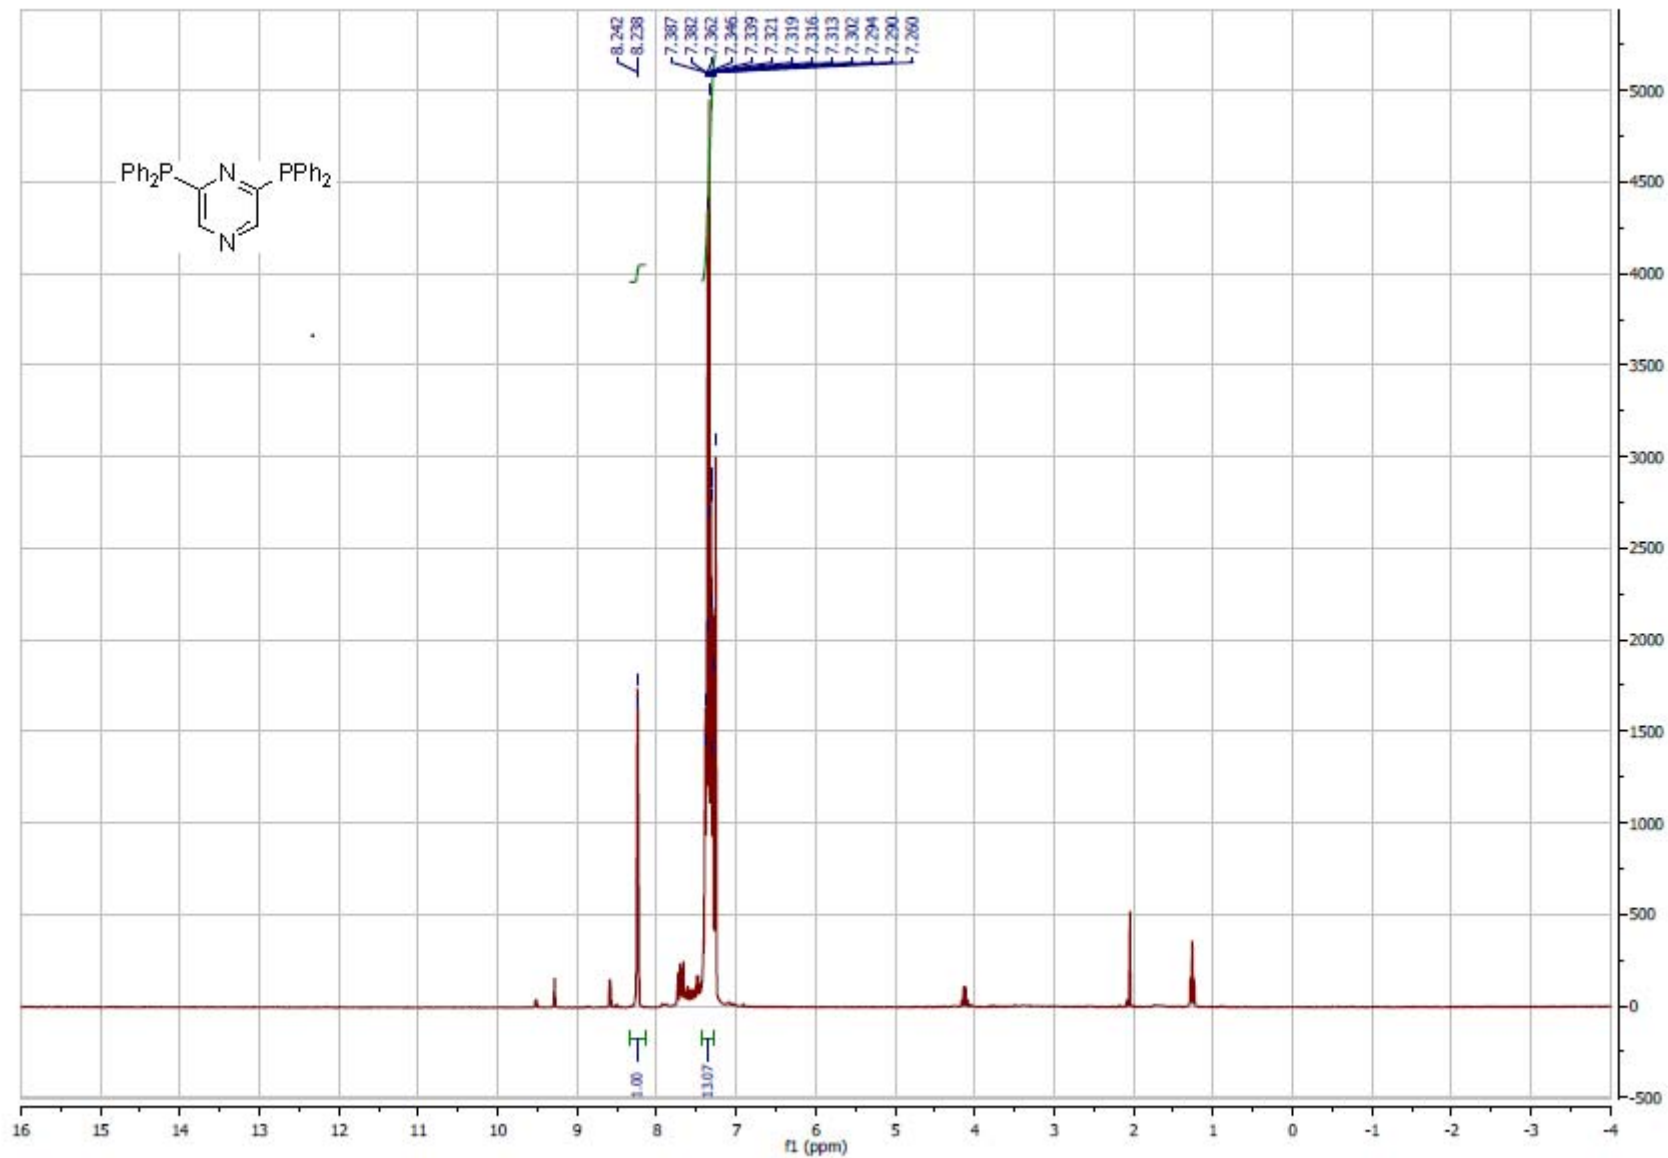

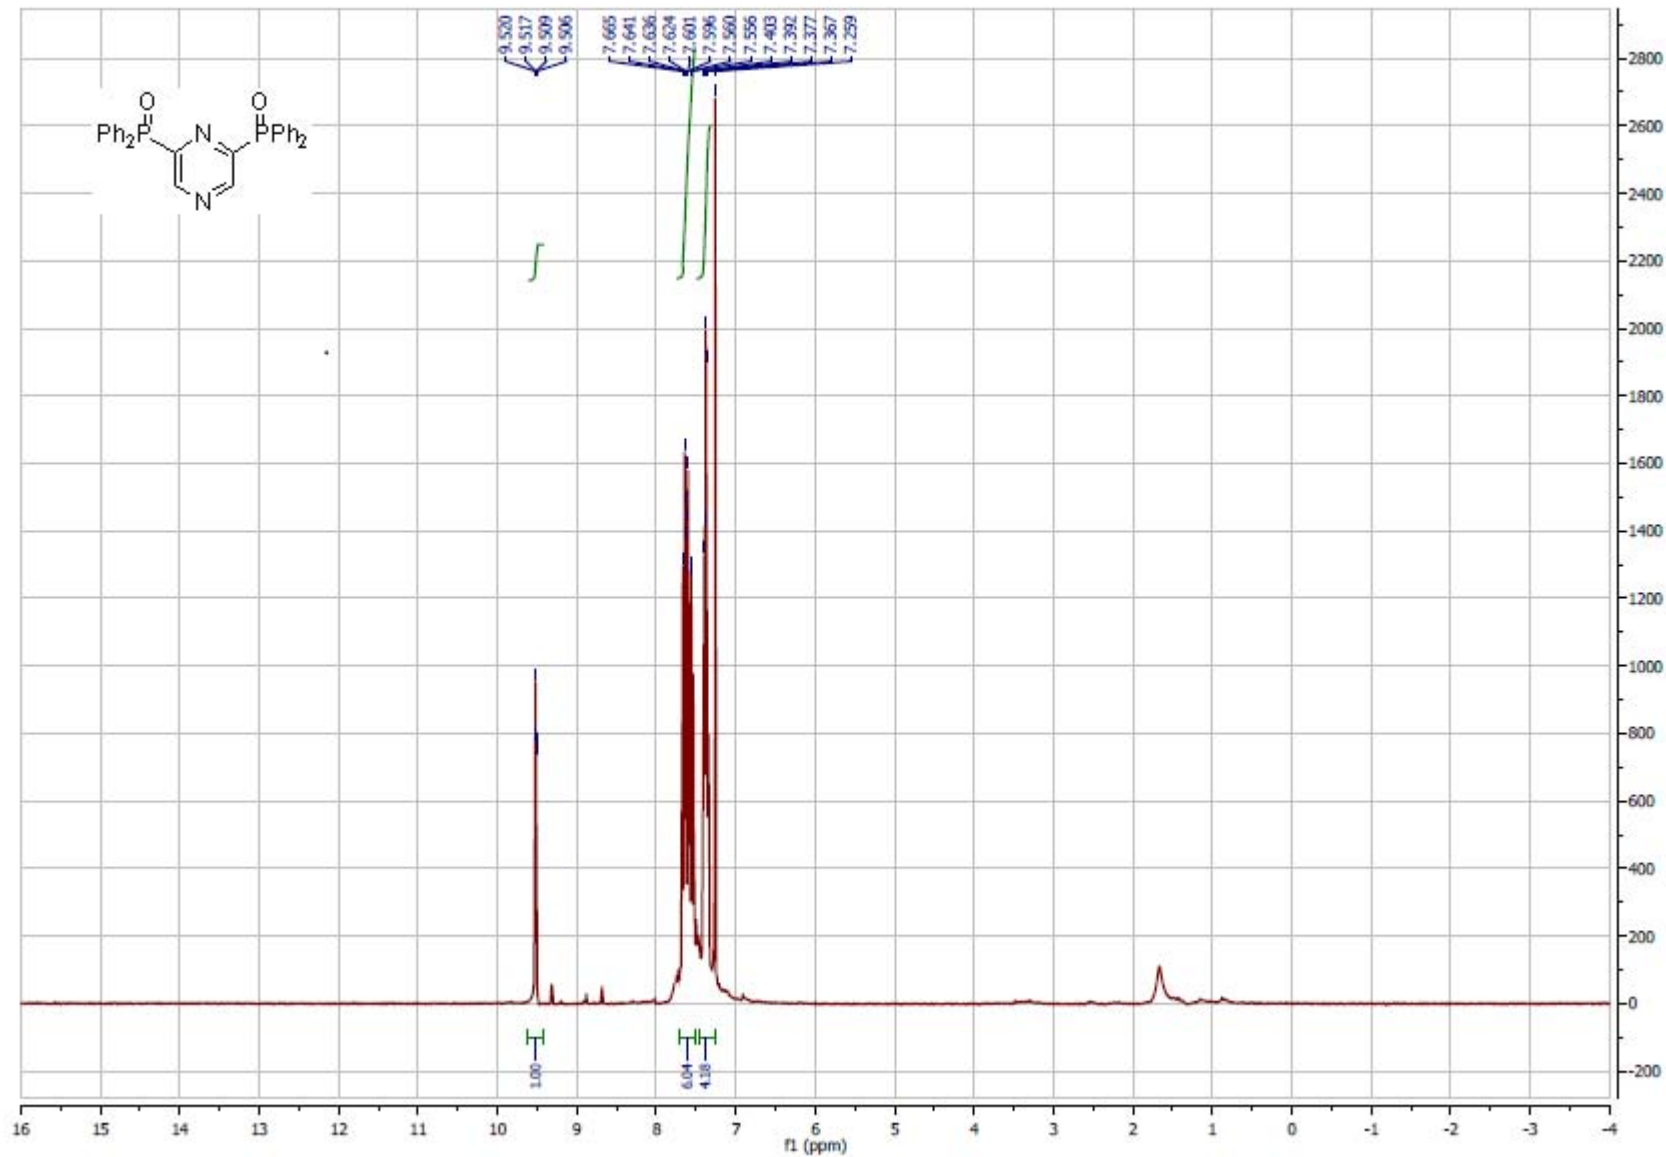

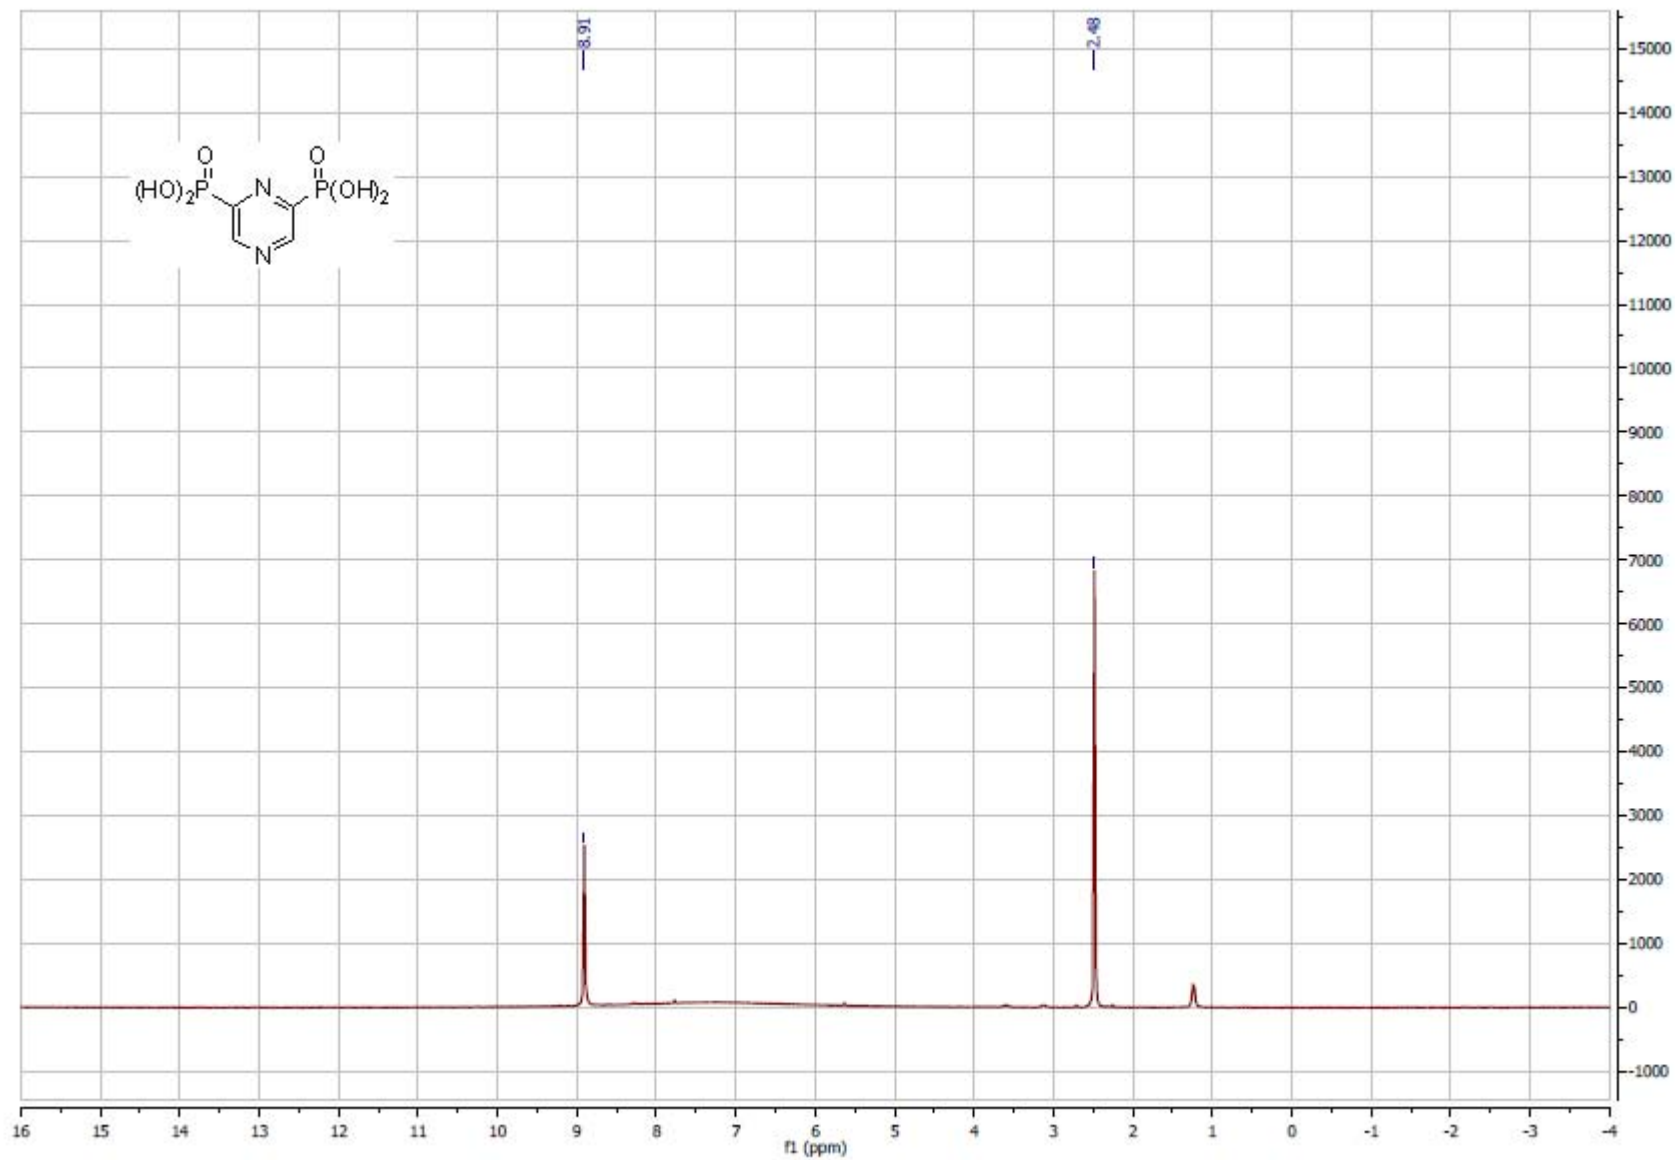



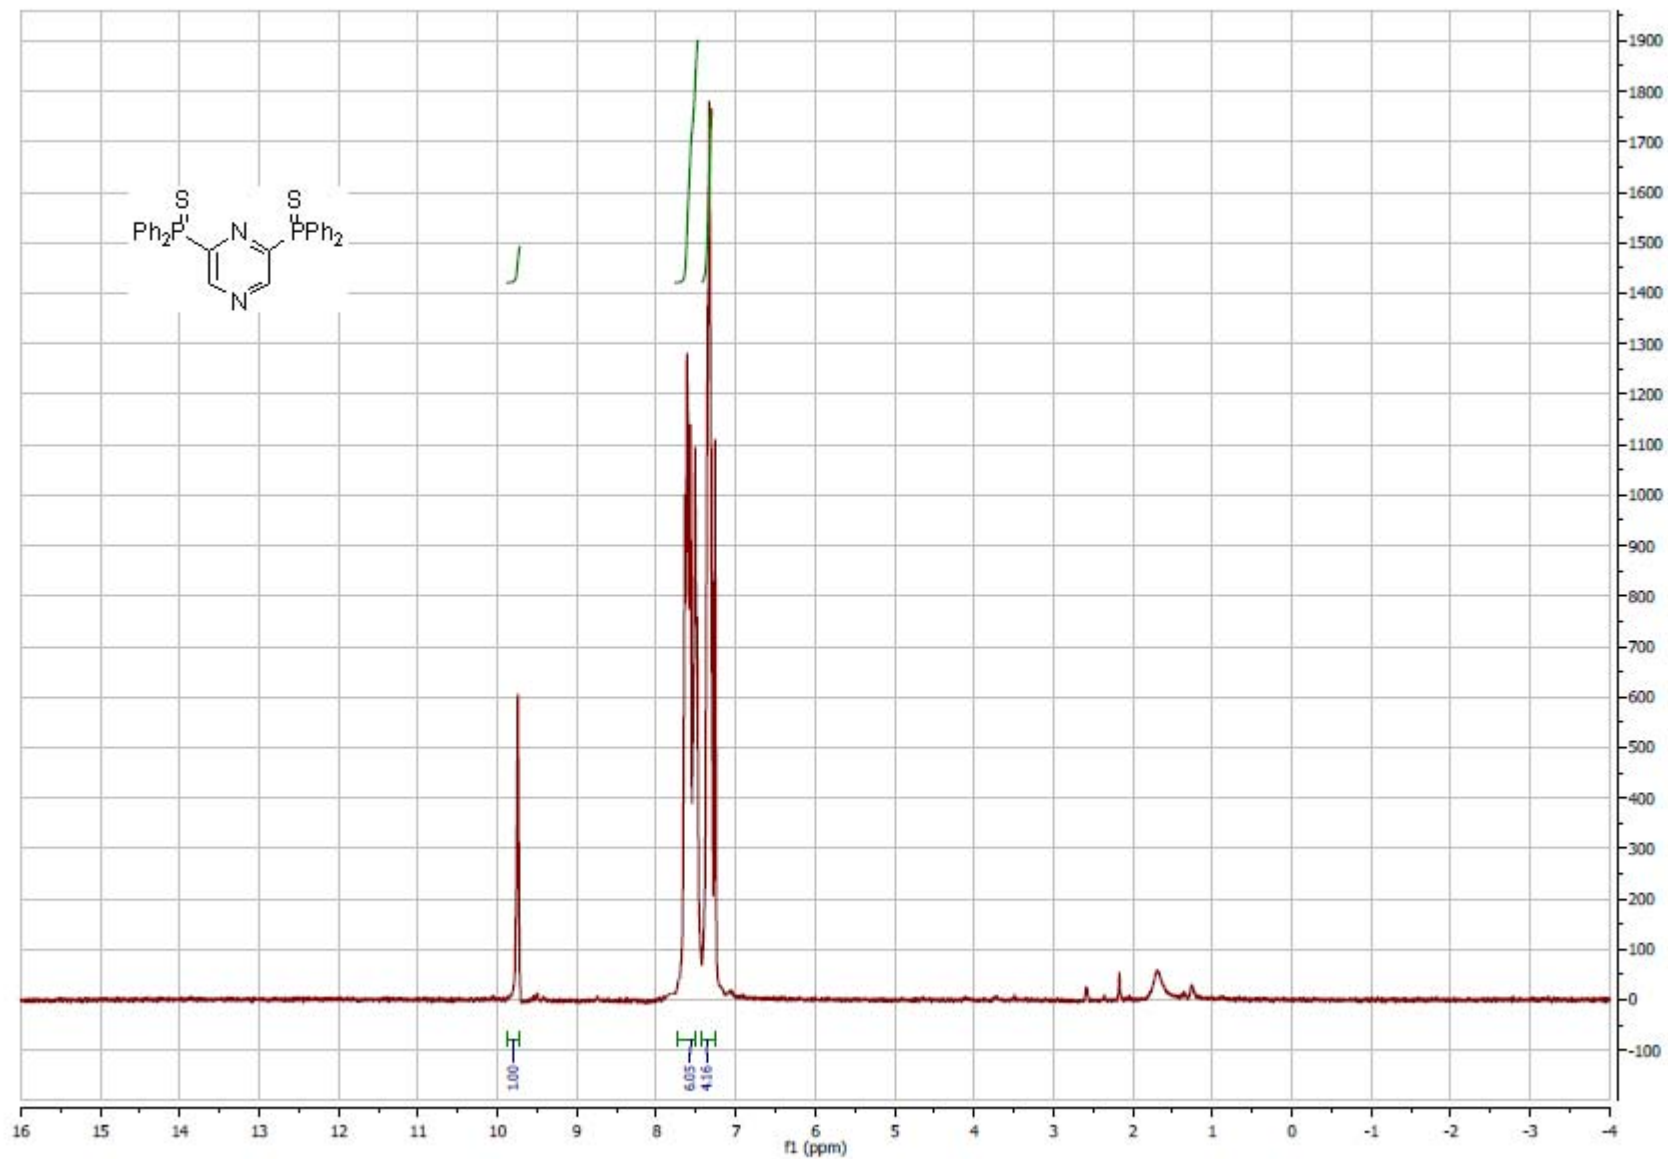

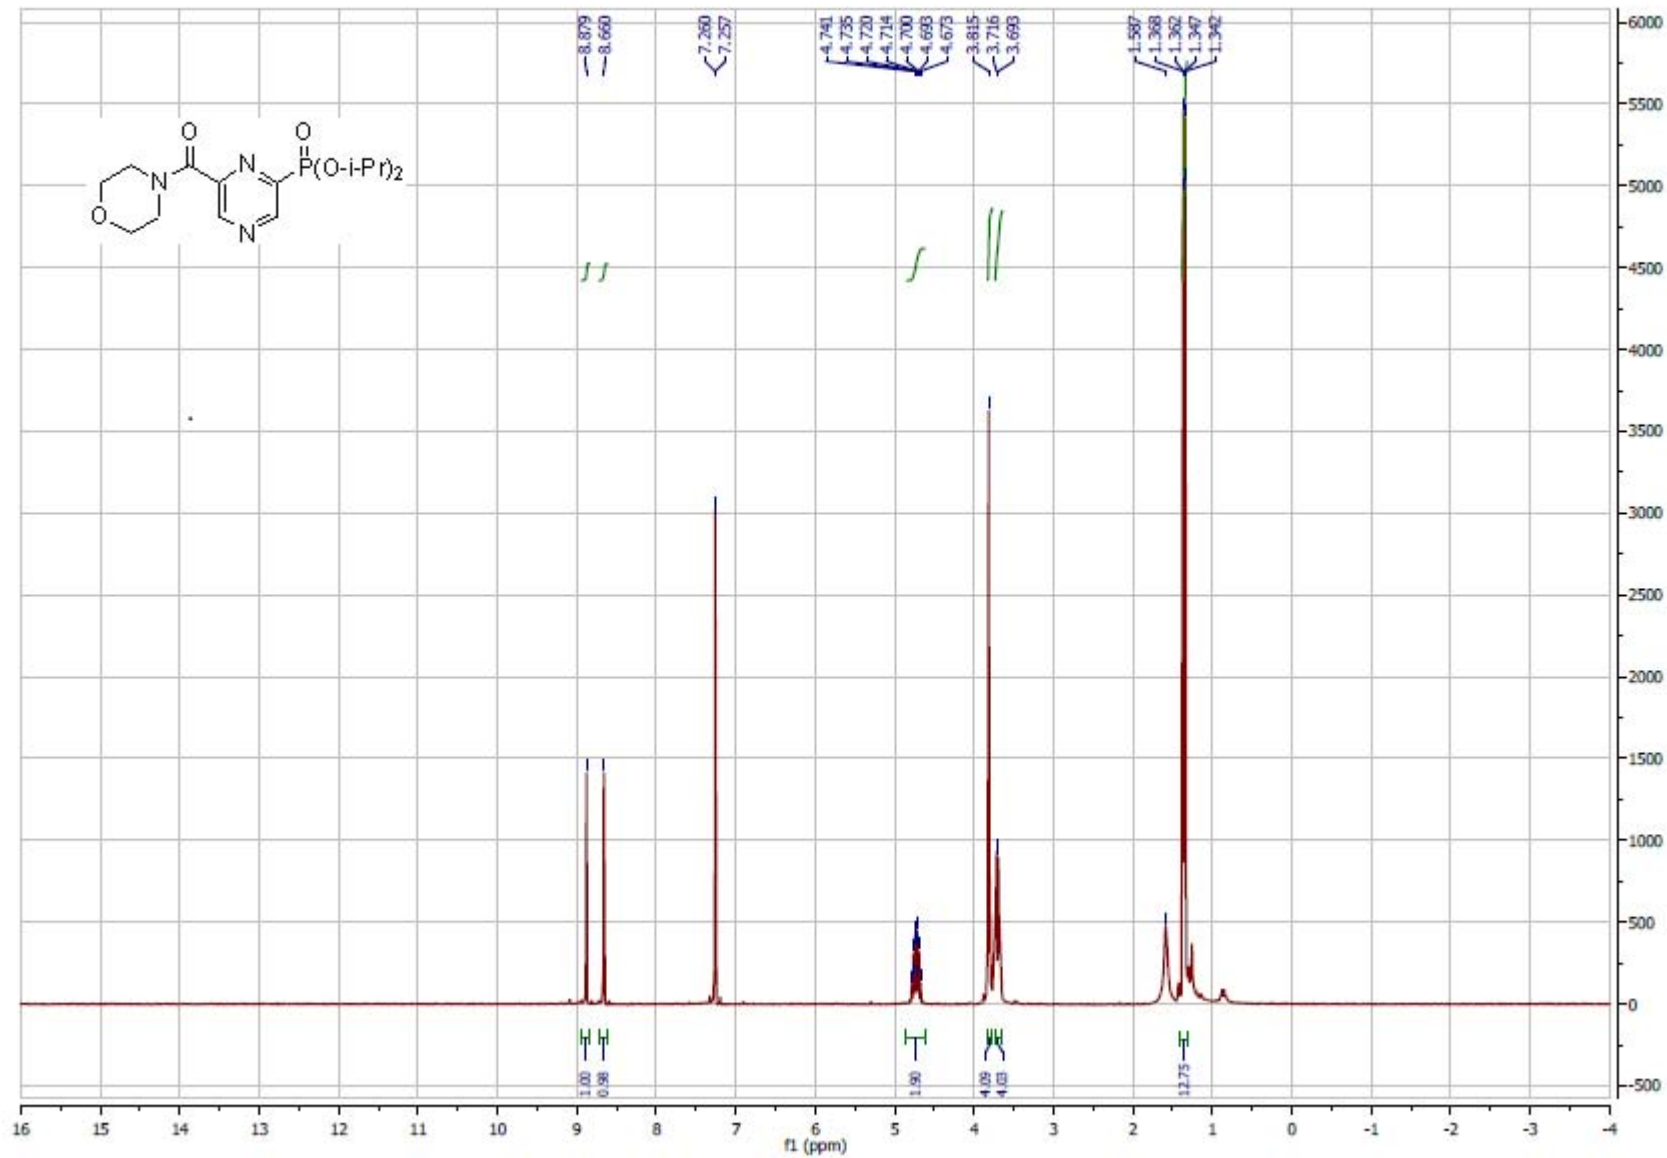

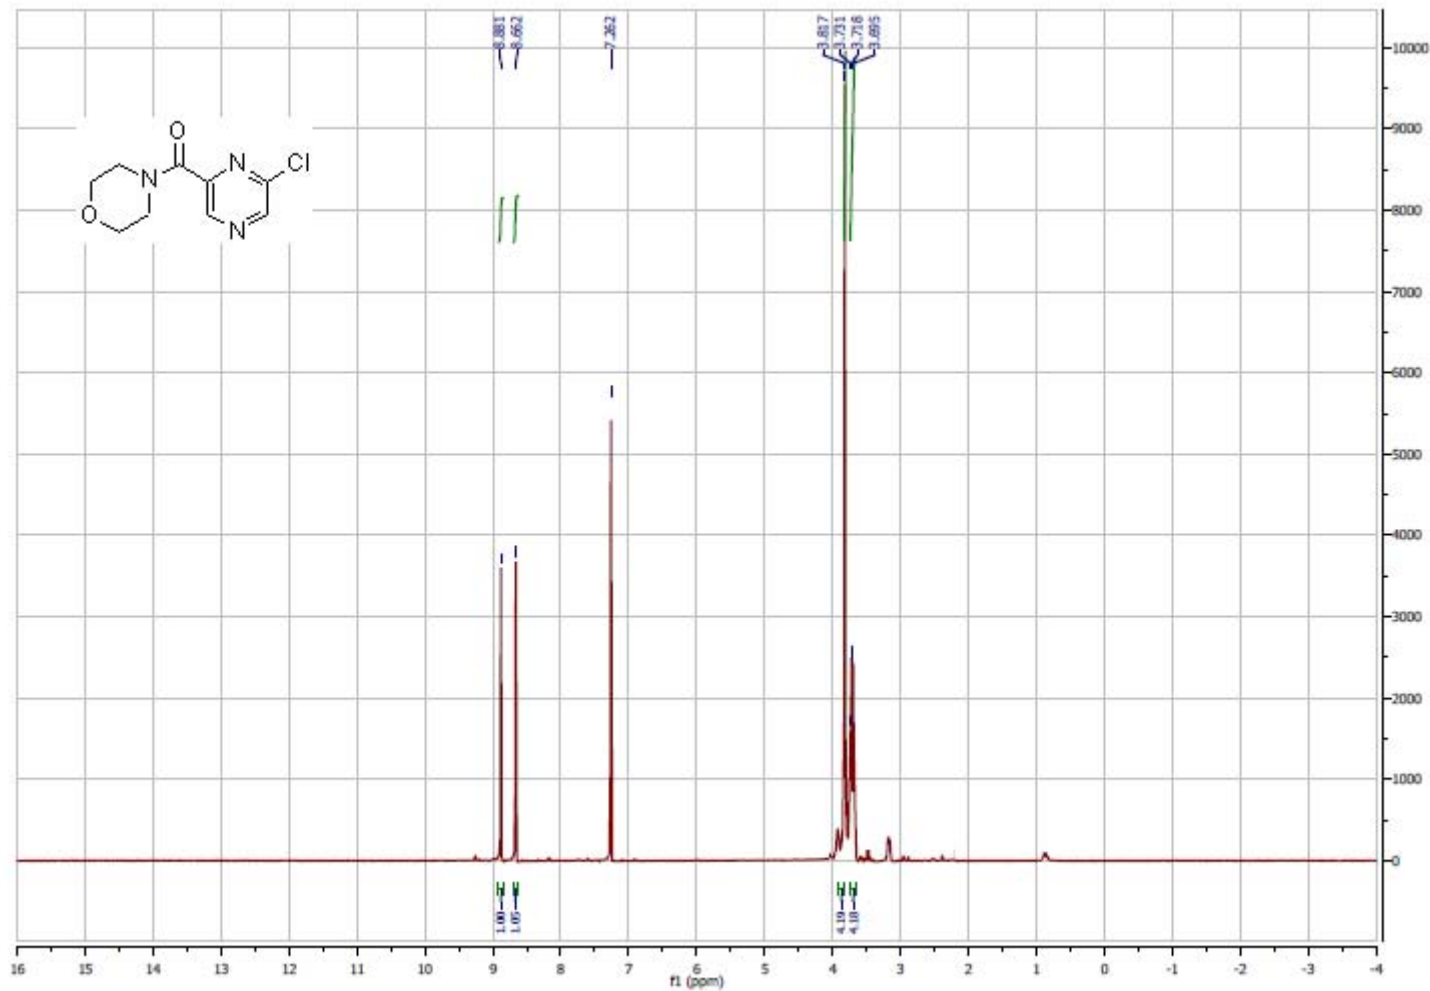

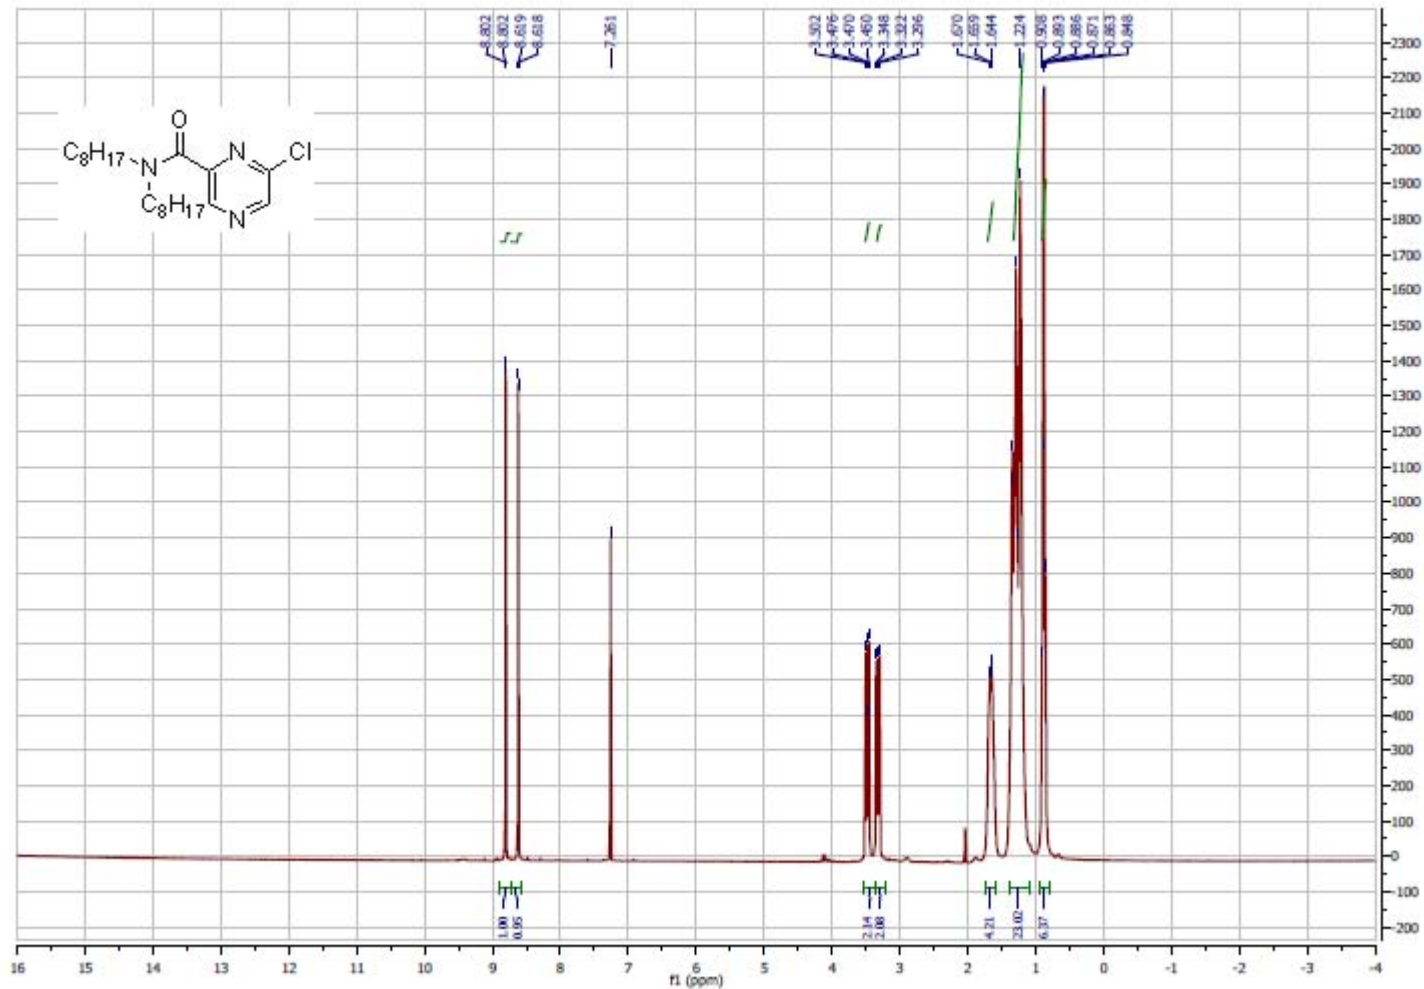

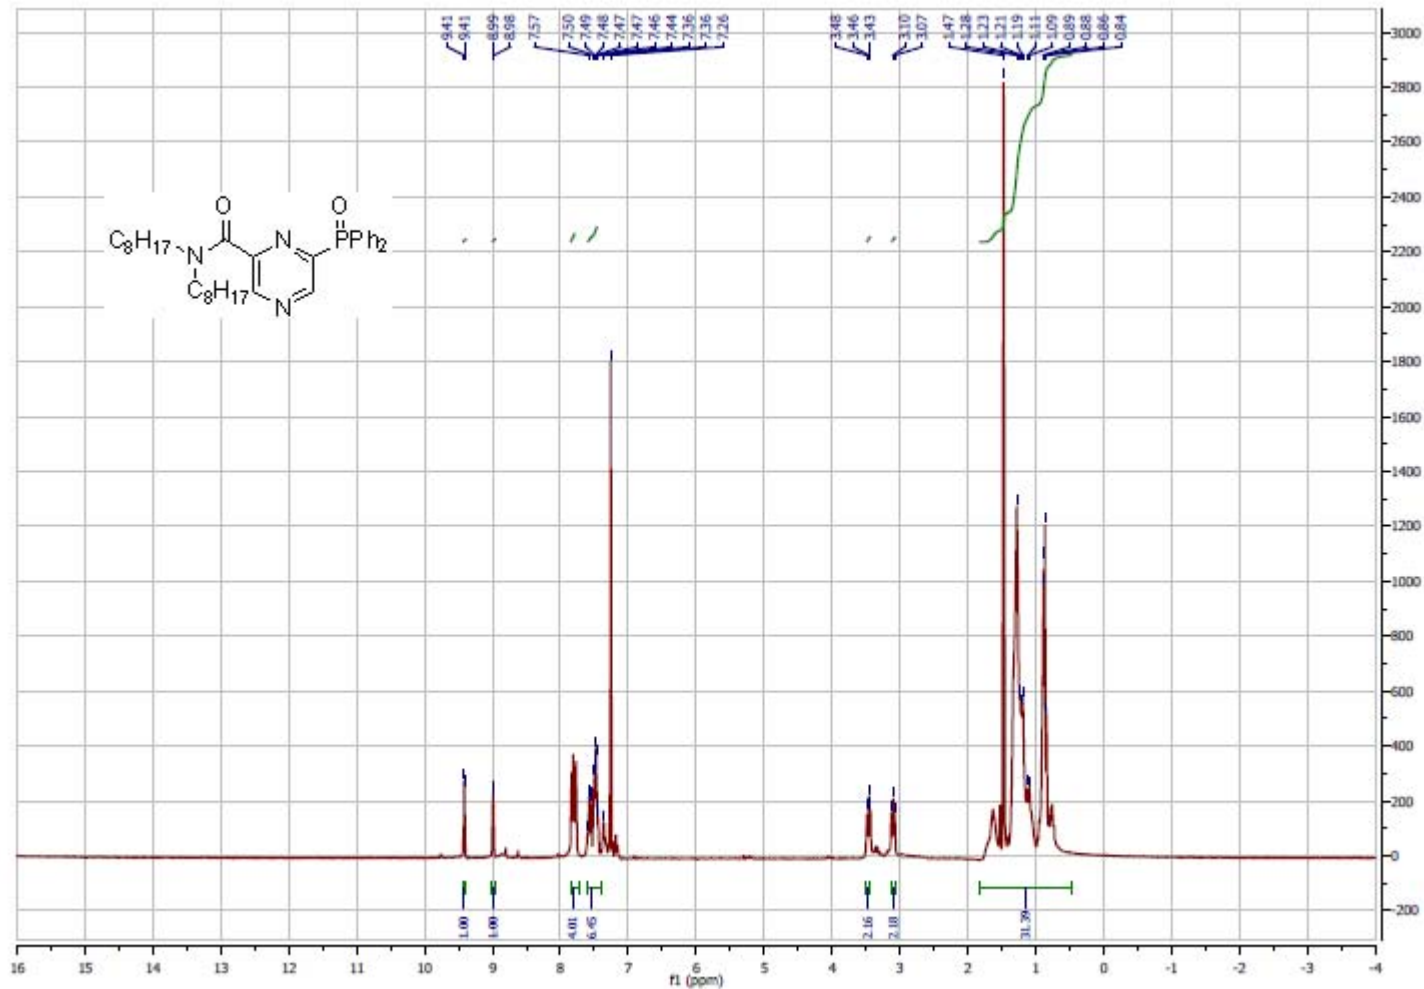

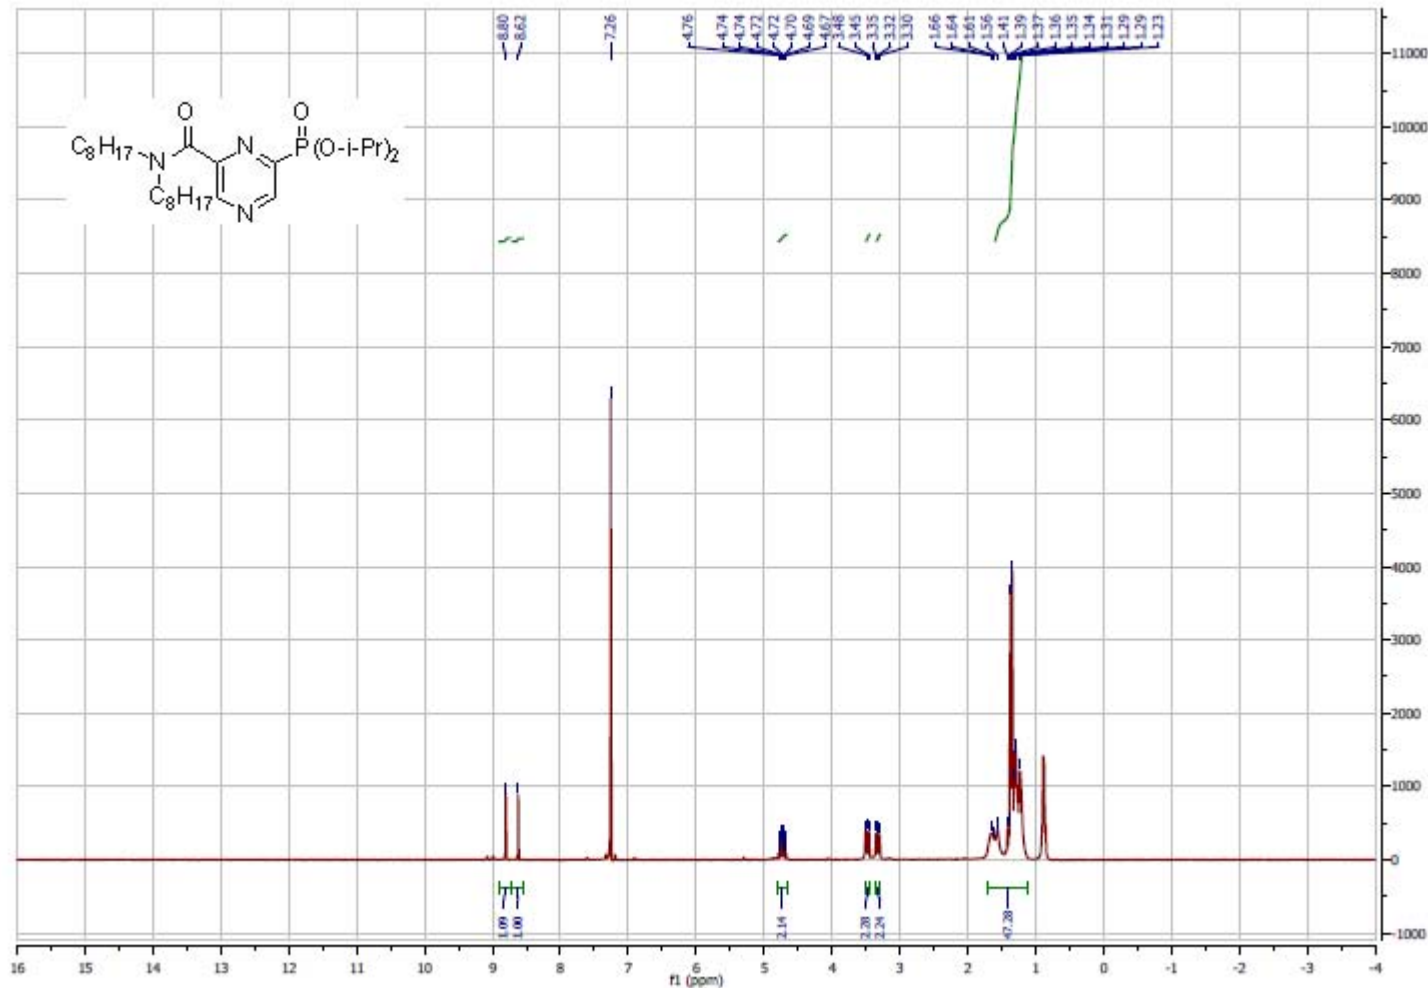

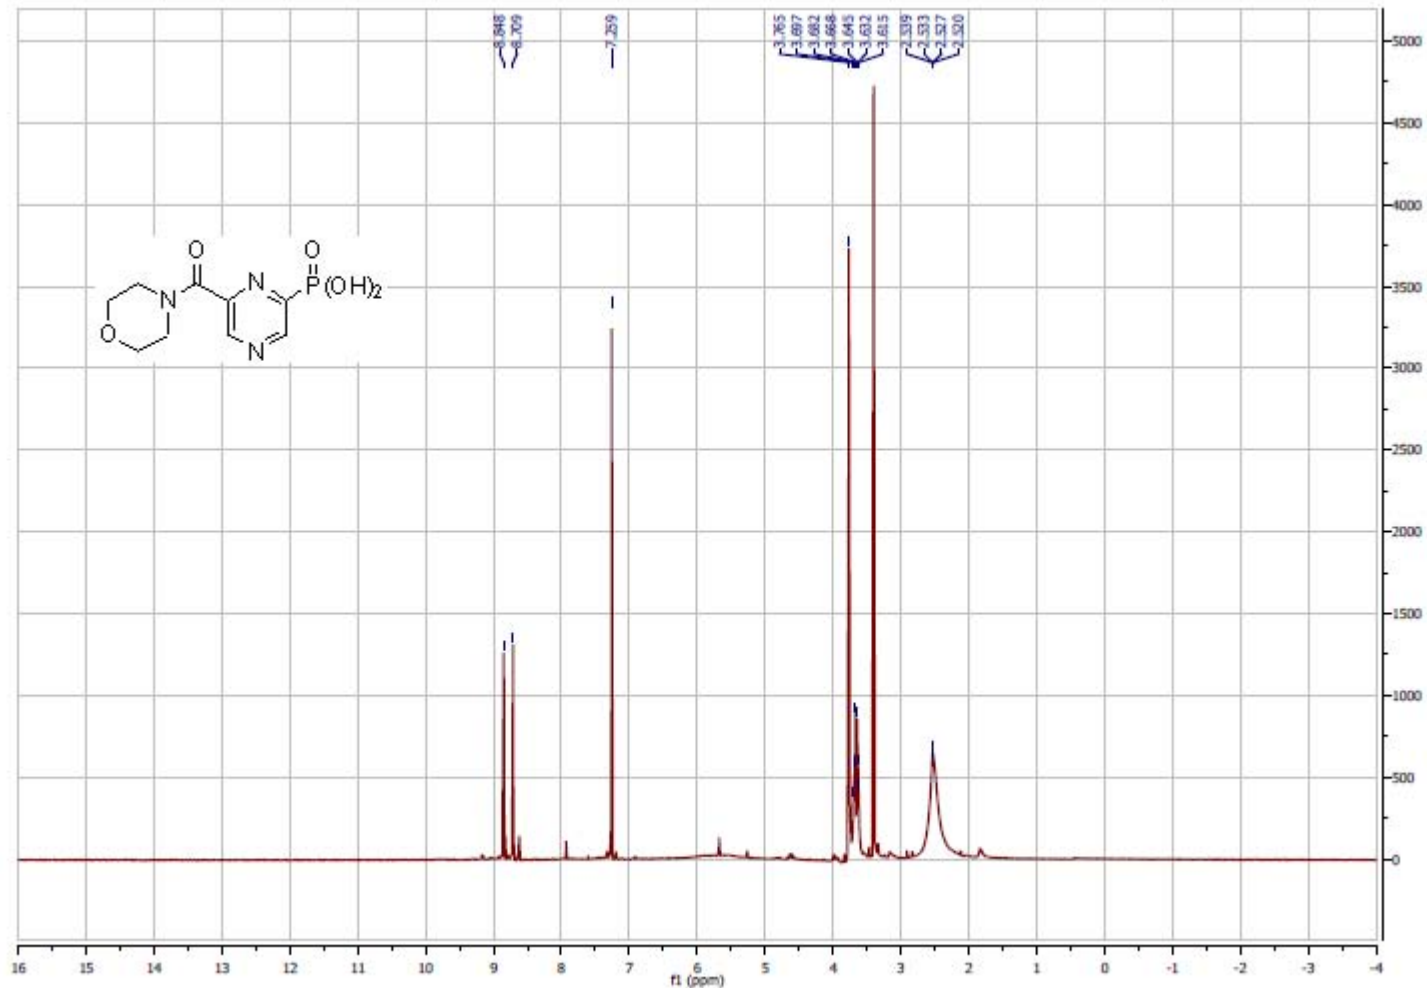

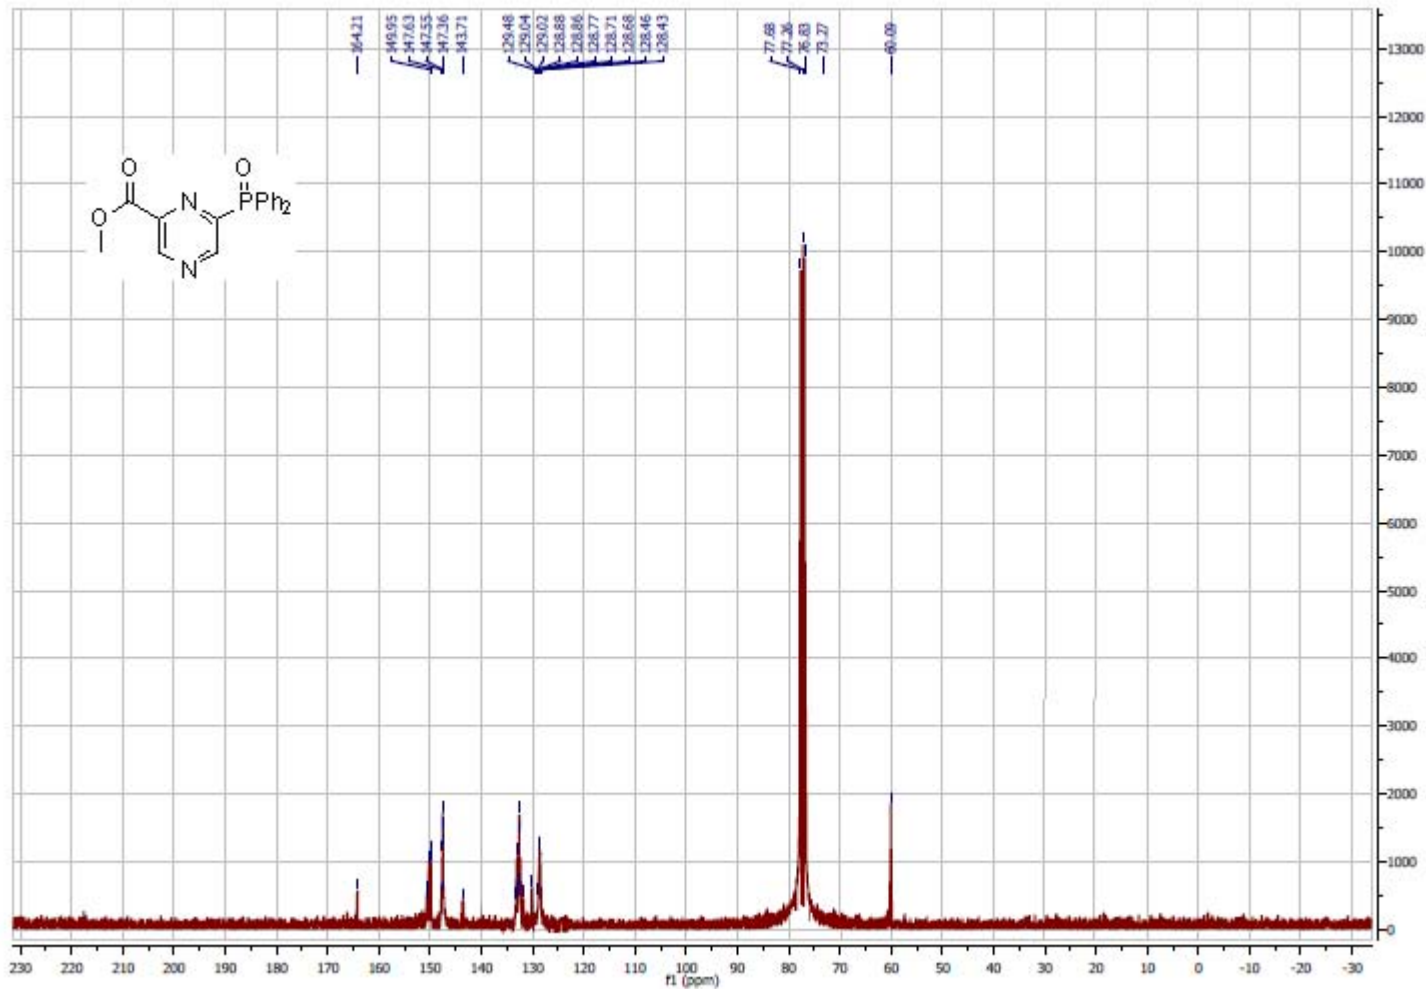



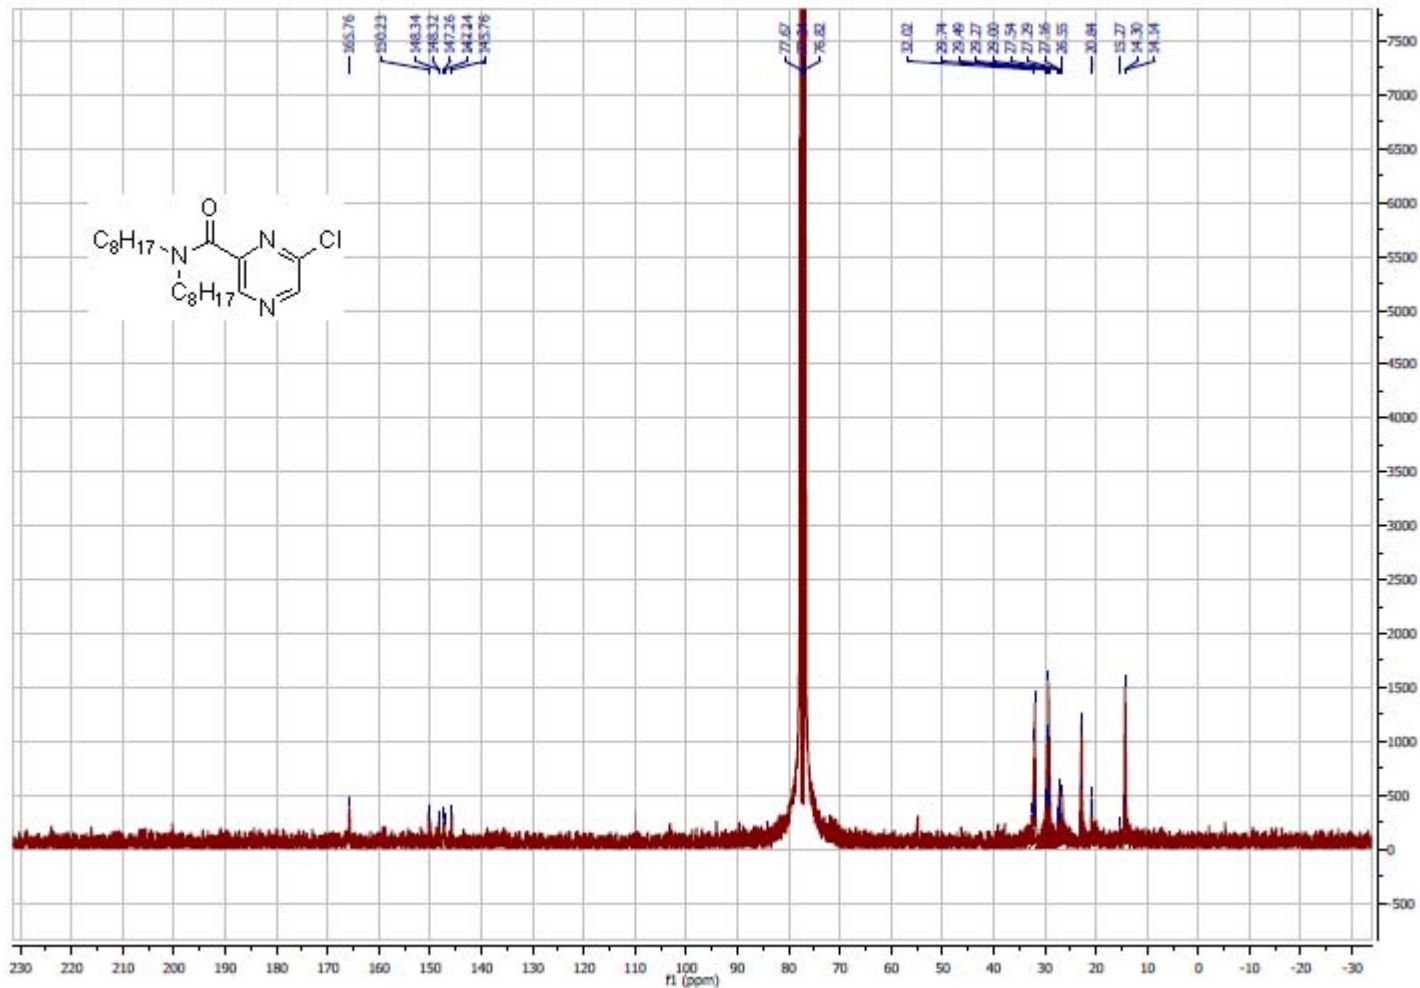

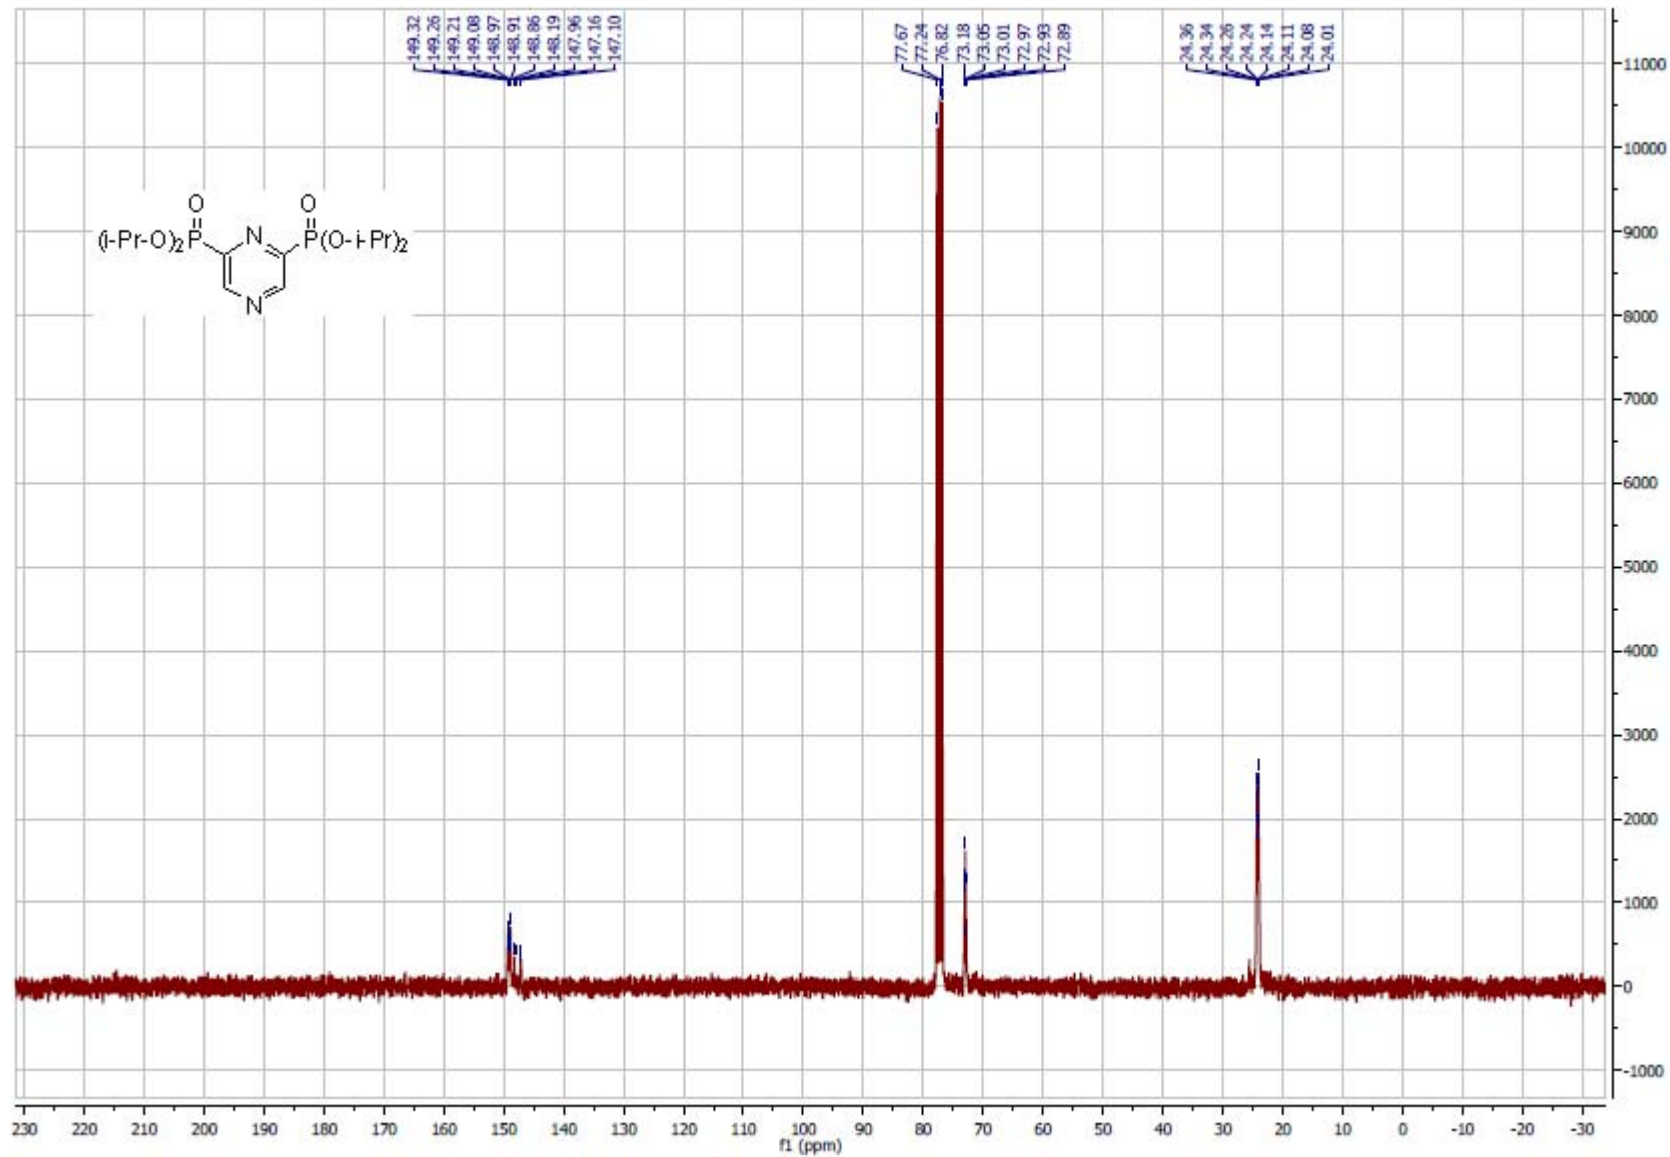

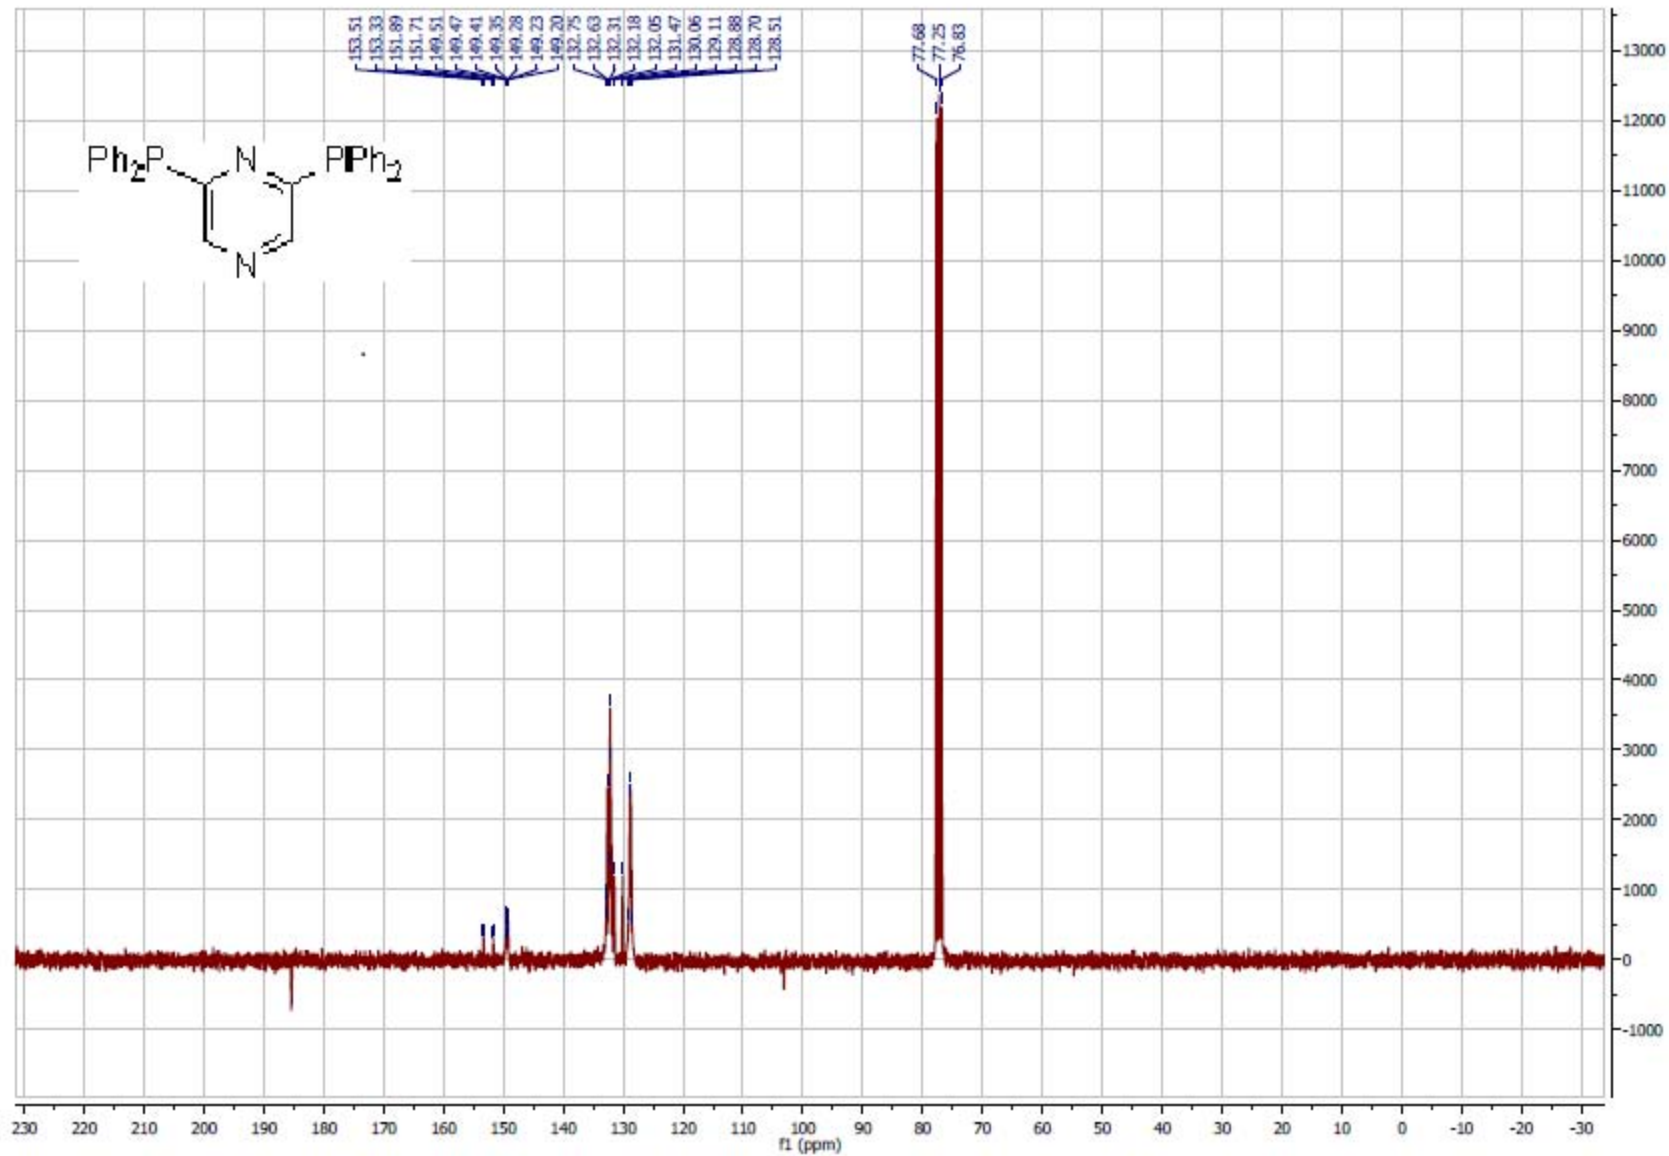

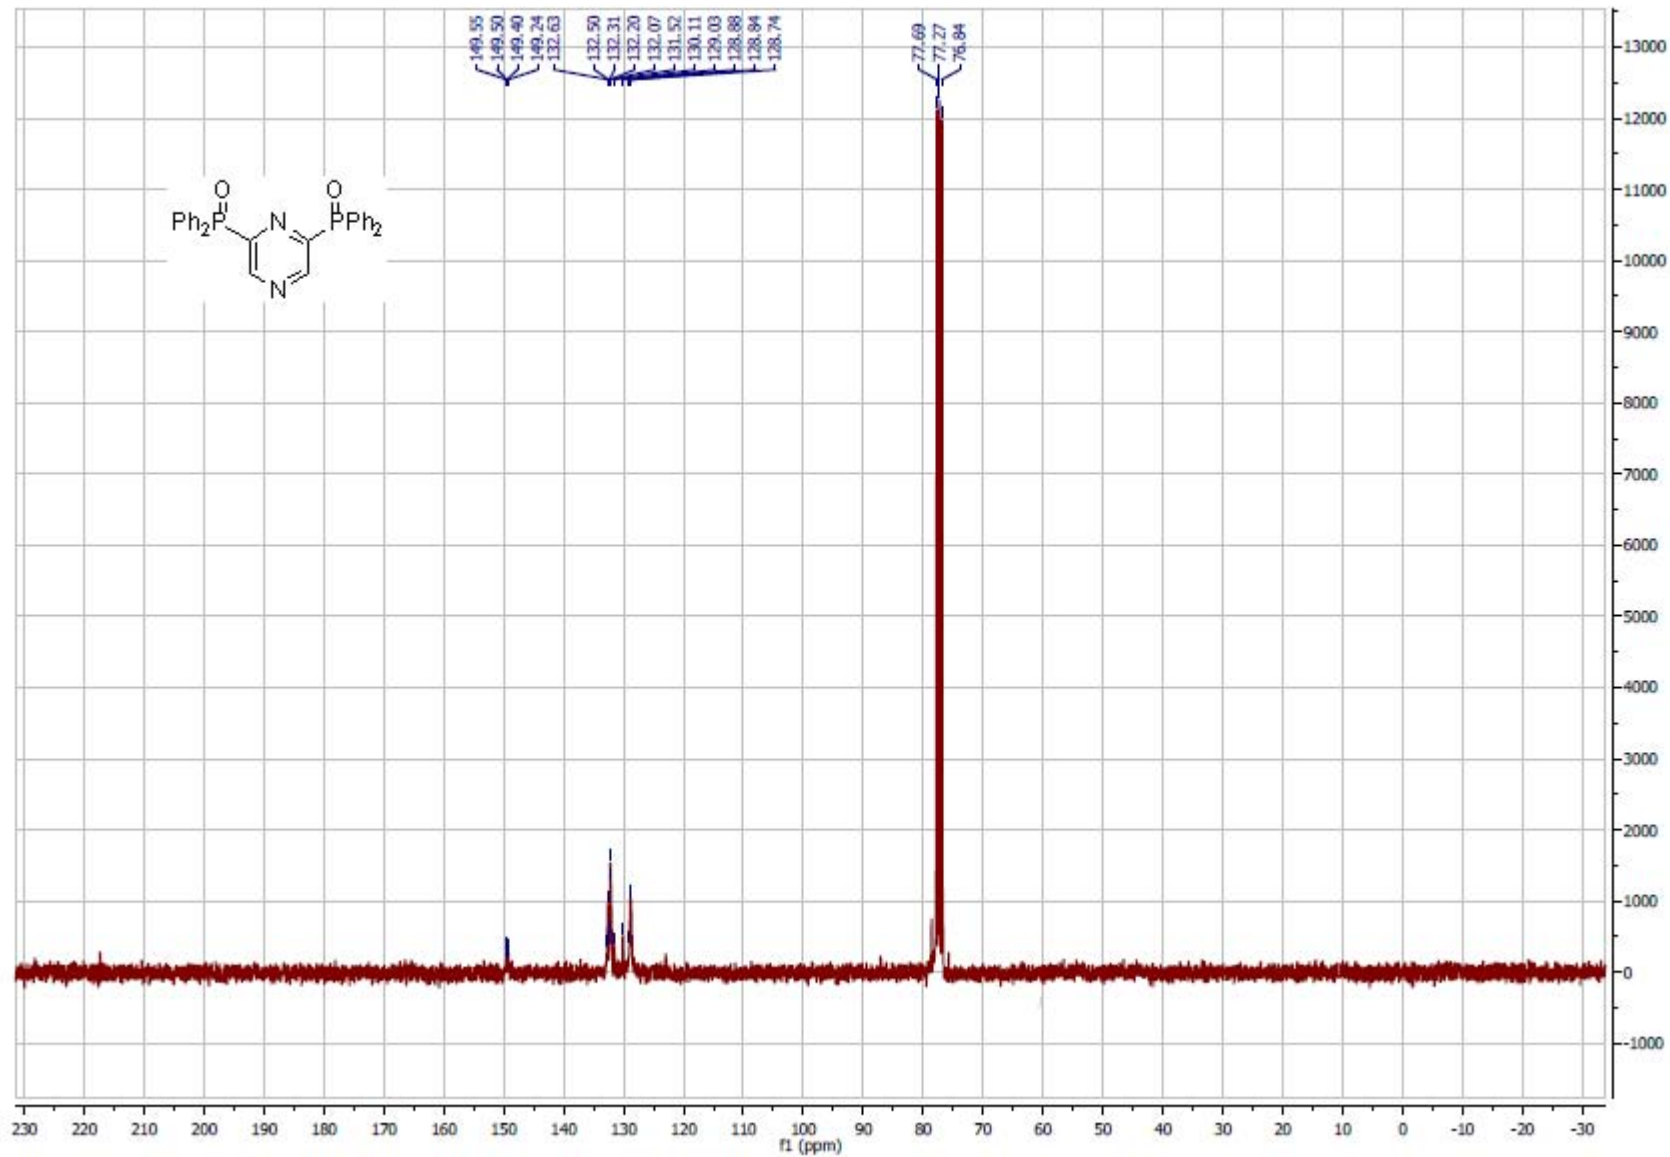

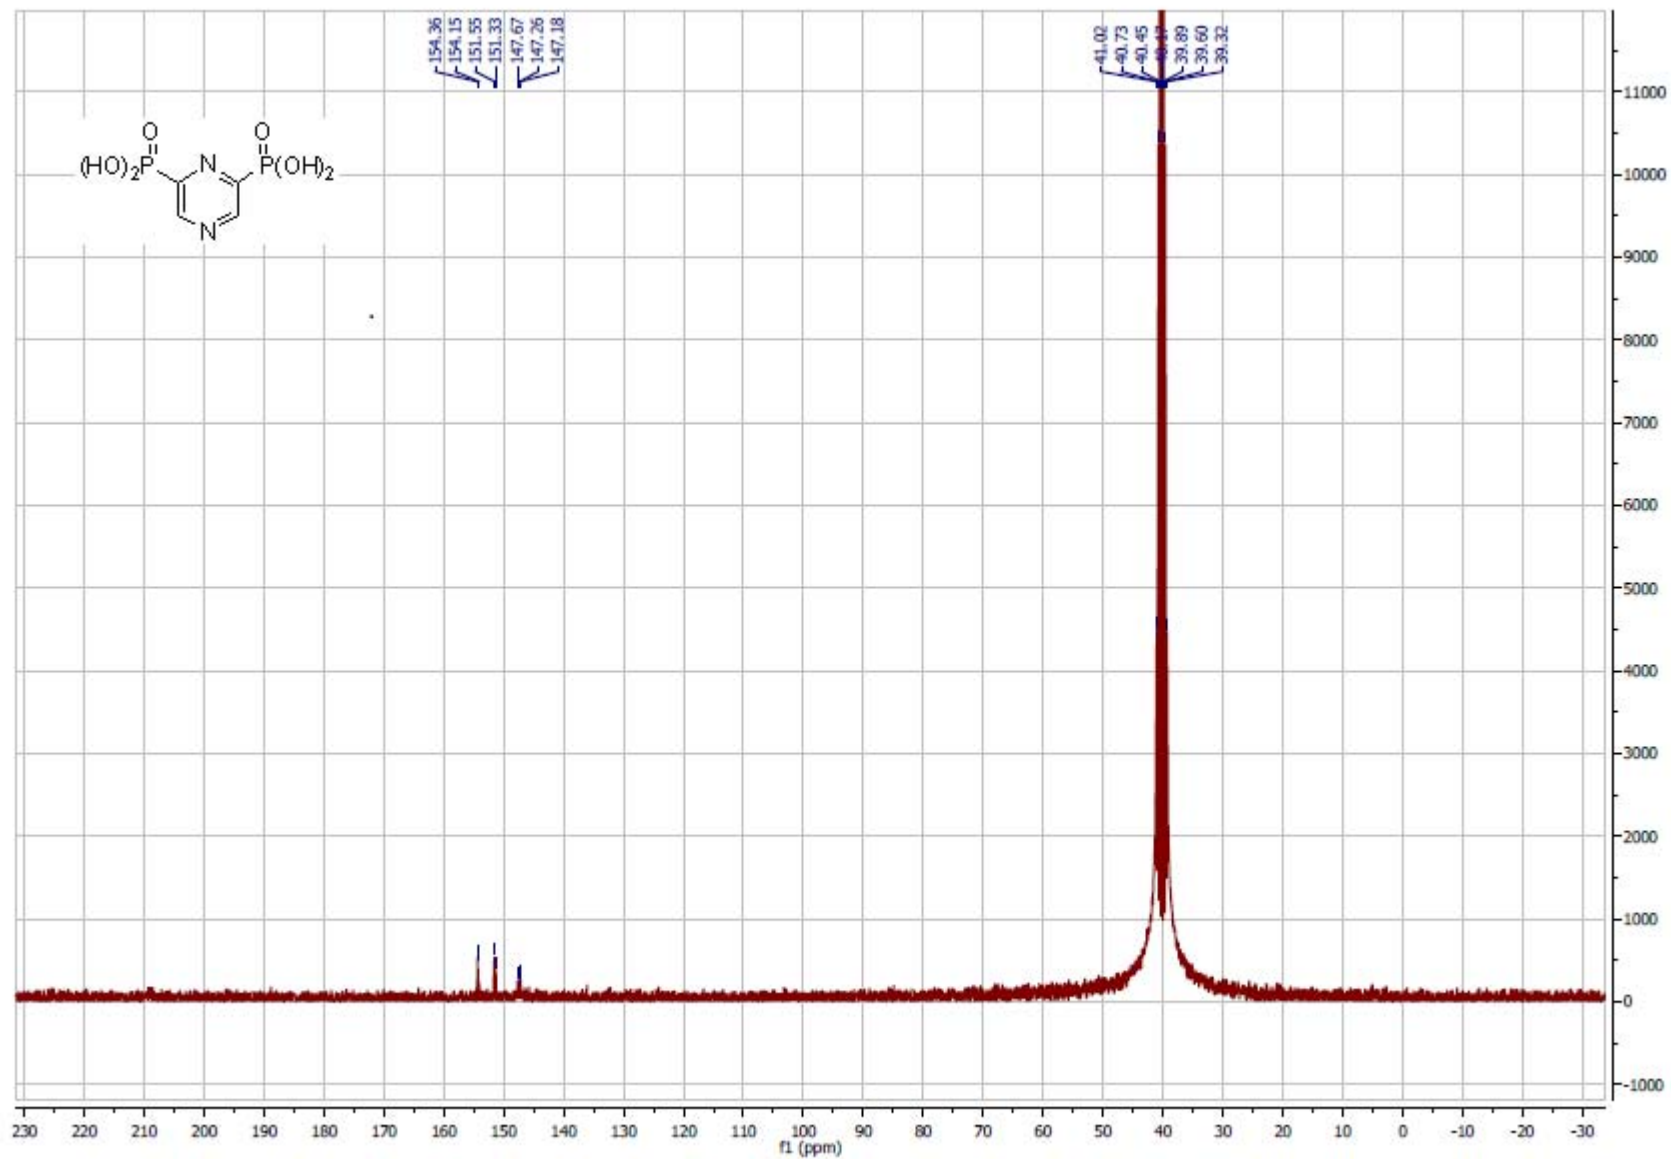

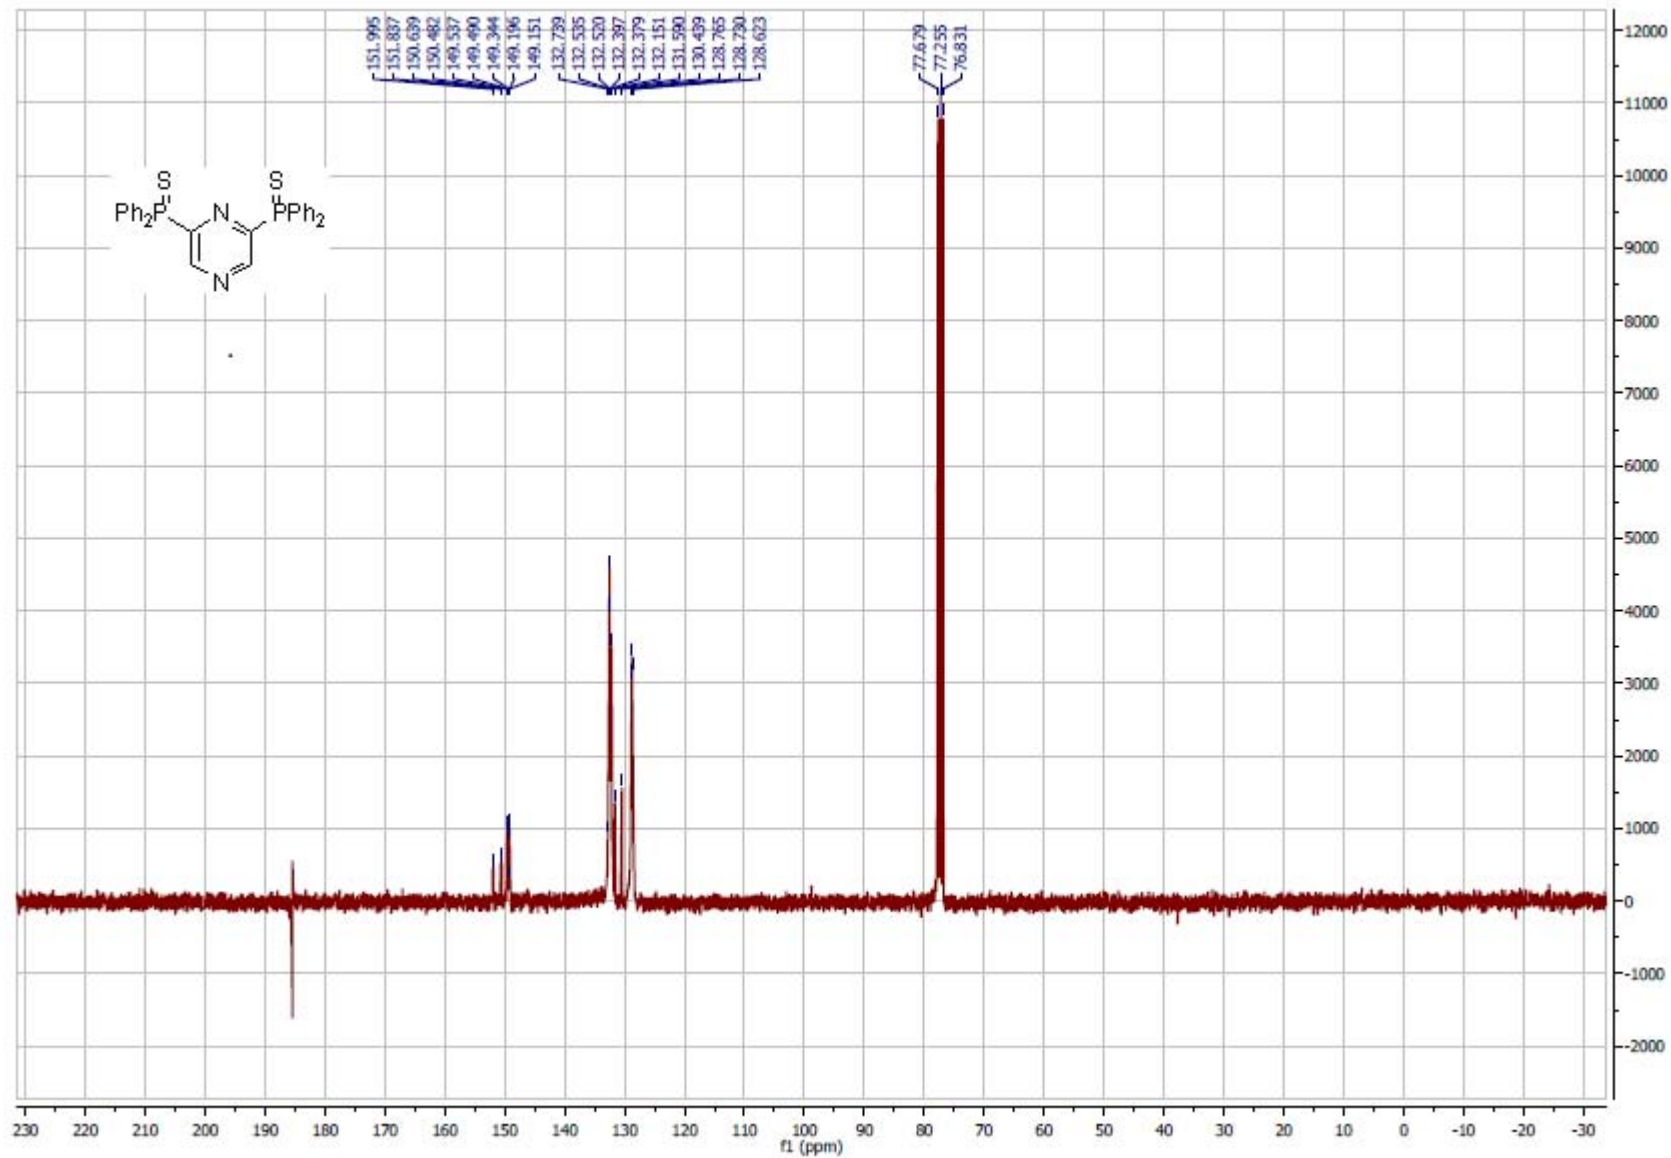

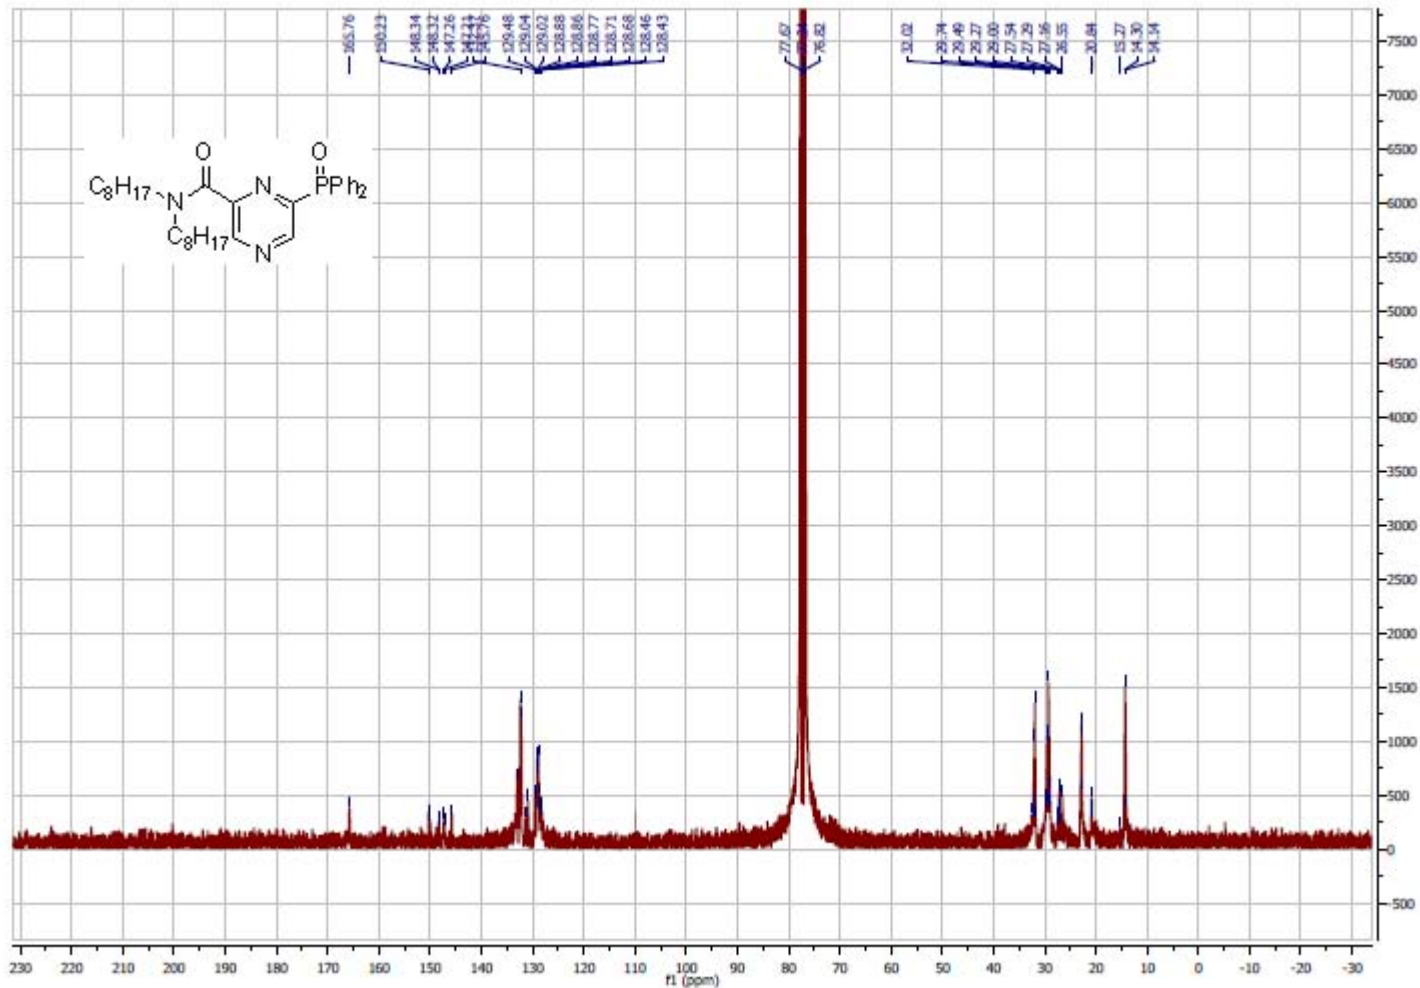

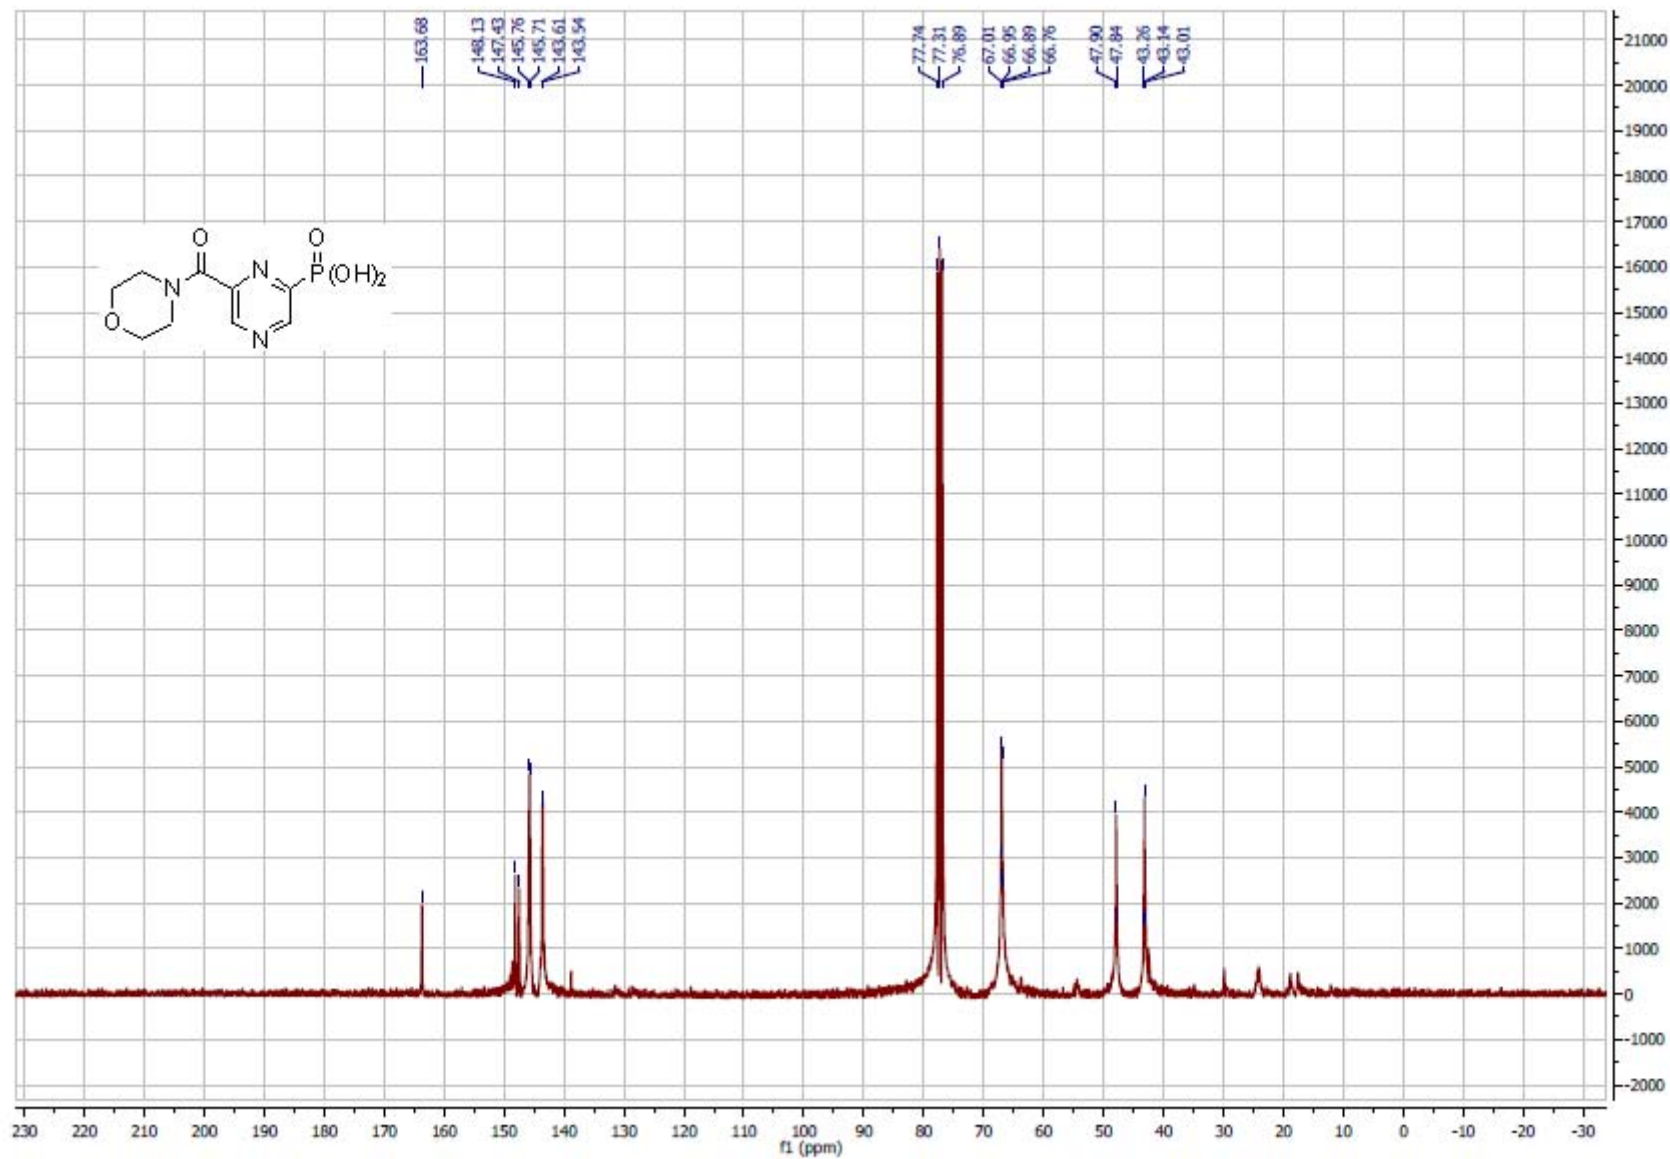



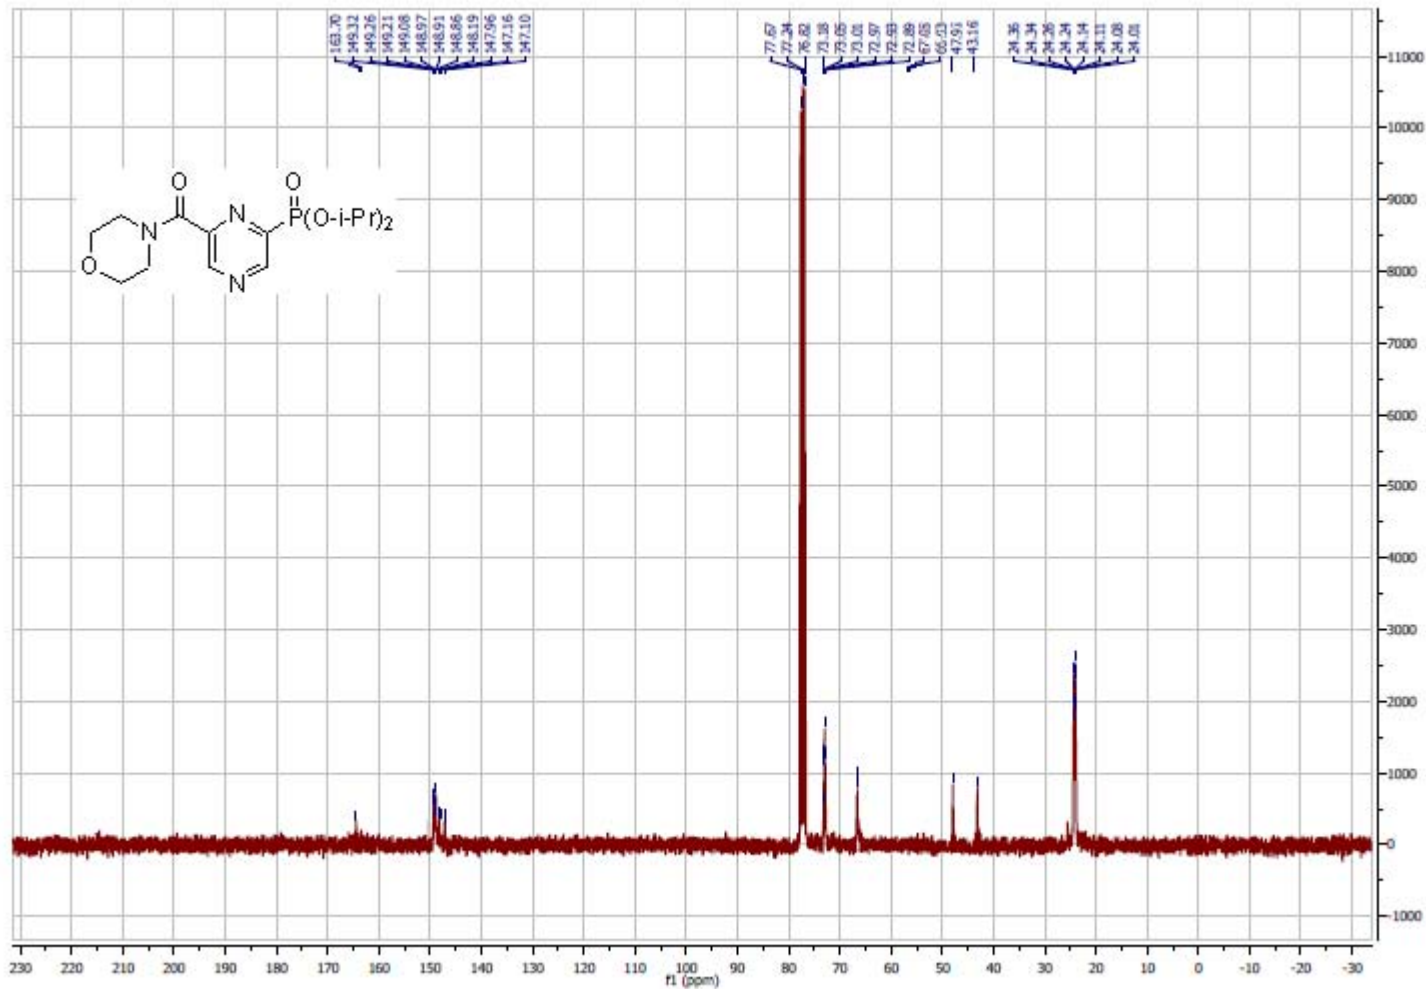

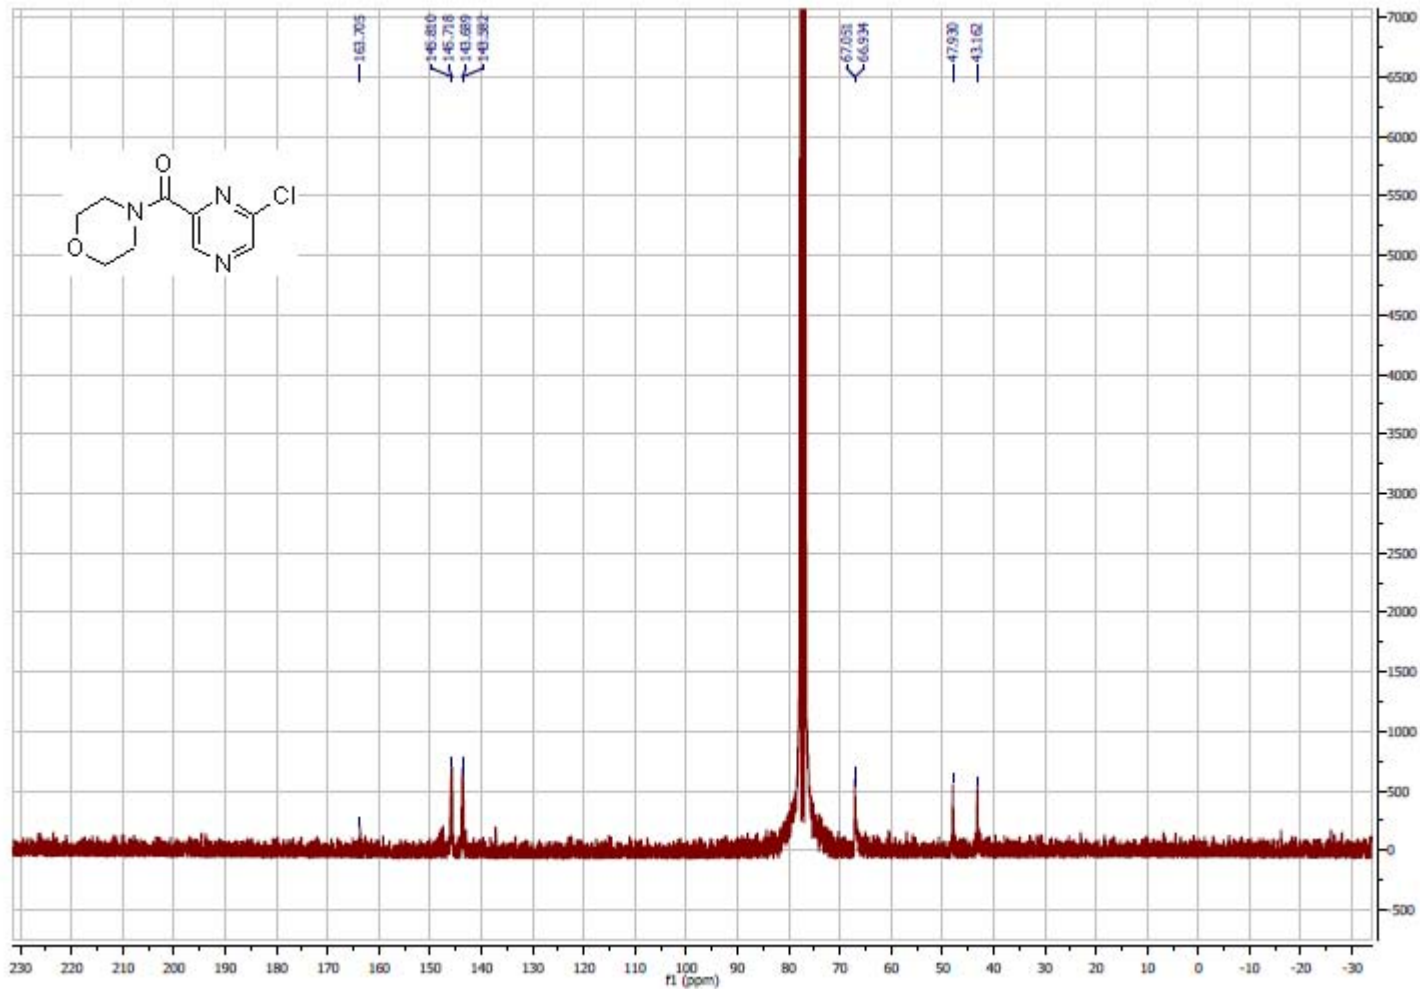

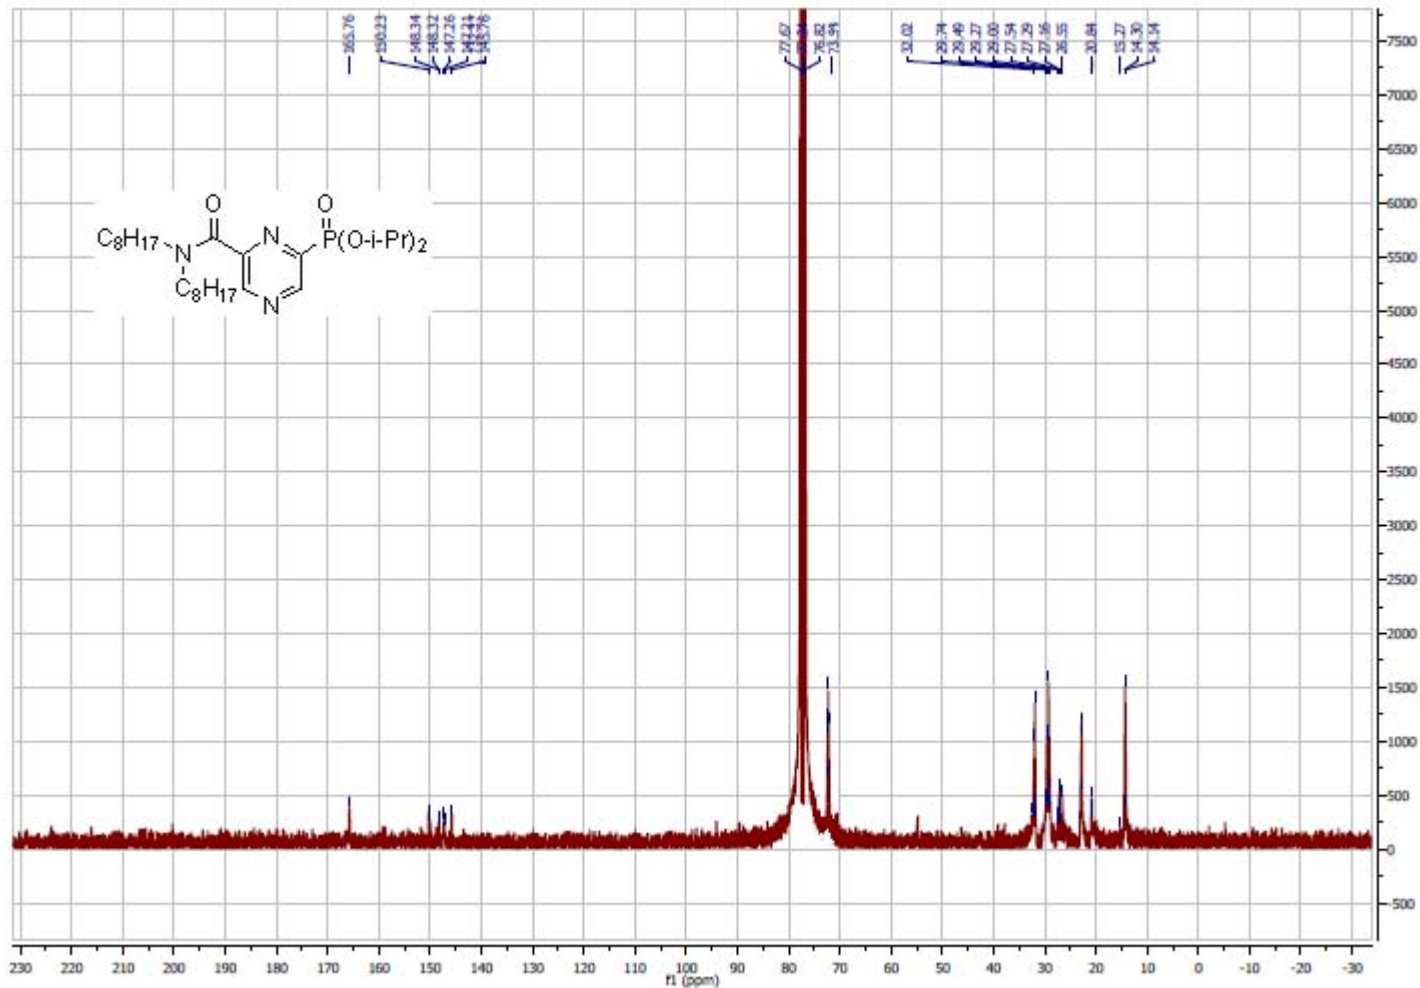

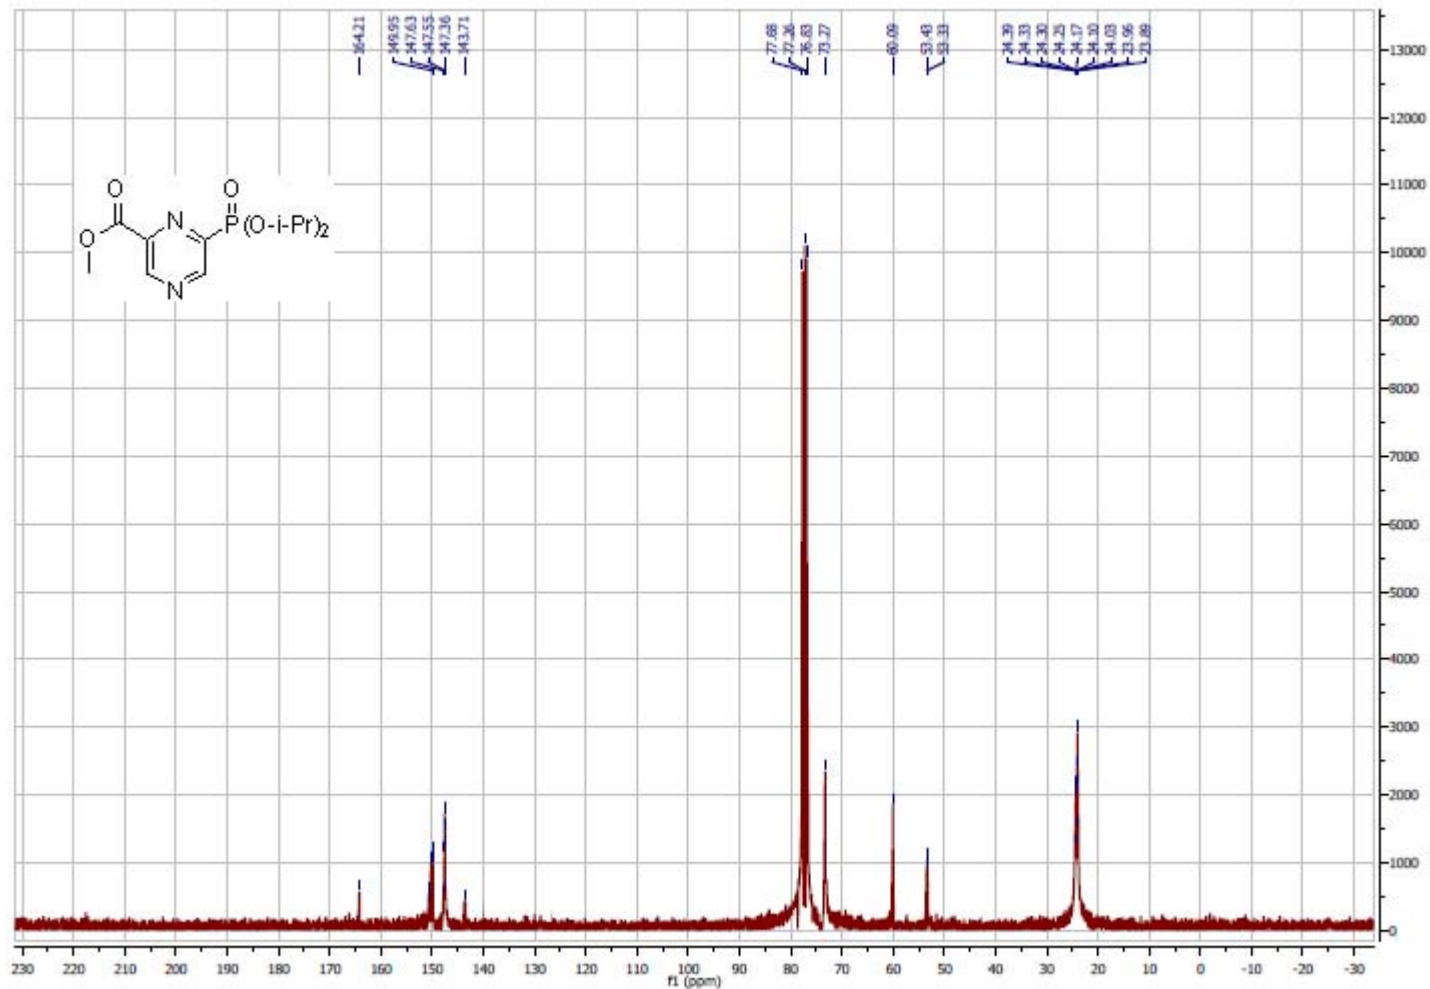

Supplement: c2ob25787d.pdf [file c2ob25787d.pdf]
